## ***nkx3.2* mutant zebrafish accommodate jaw joint loss through a phenocopy of the head shapes of Paleozoic jawless fish**

Tetsuto Miyashita<sup>1,2</sup>, Pranidhi Baddam<sup>3</sup>, Joanna Smeeton<sup>4</sup>, A. Phil Oel<sup>1,5</sup>, Natasha Natarajan<sup>4</sup>, Brogan Gordon<sup>1</sup>, A. Richard Palmer<sup>1</sup>, J. Gage Crump<sup>4</sup>, Daniel Graf<sup>3,6</sup>, and W. Ted Allison<sup>1,6\*</sup>

<sup>1</sup> Department of Biological Sciences, University of Alberta, Edmonton, Alberta, Canada T6G 2E9

<sup>2</sup> Department of Organismal Biology and Anatomy, University of Chicago, Chicago, IL 60637, USA

<sup>3</sup> Department of Dentistry, University of Alberta, Edmonton, Alberta, Canada T6G 2R3

<sup>4</sup> Department of Stem Cell Biology and Regenerative Medicine, W.M. Keck School of Medicine, University of Southern California, Los Angeles, CA 90033, USA

<sup>5</sup> Current Address: Developmental Biology Unit, European Molecular Biology Laboratory, Heidelberg, 69117, Germany

<sup>6</sup> Department of Medical Genetics, University of Alberta, Edmonton, Alberta, Canada T6G 2R7

\* Corresponding author. [ted.allison@ualberta.ca](mailto:ted.allison@ualberta.ca); 780-492-4430.

KEY WORDS: Skeletal remodeling, Developmental plasticity, Jaw, Joint, Zebrafish, Agnatha, *Nkx3.2*, *Bapx*

RUNNING TITLE: Functionally jawless zebrafish

## 2 ABSTRACT

3 The vertebrate jaw is a versatile feeding apparatus that facilitated explosive diversification. To  
4 function, it requires a joint between the upper and lower jaws, so jaw joint defects — such as  
5 osteoarthritis or even ankylosis — are often highly disruptive and difficult to study. To describe  
6 consequences of jaw-joint dysfunction, we engineered two independent null alleles of a single jaw-joint  
7 marker gene, *nkx3.2*, in zebrafish. These mutations caused zebrafish to become functionally jawless via  
8 fusion of the upper and lower jaw cartilages (ankylosis). Despite lacking jaw joints, *nkx3.2* mutants  
9 survive to adulthood and accommodate this defect by: a) remodeling their skulls; and b) altering their  
10 behavior from suction feeding to ram feeding. As a result of remodeling, *nkx3.2* mutants developed  
11 superficial similarities to the skull shapes observed in two lineages of ancient jawless vertebrates  
12 (anaspids and furcacauidiid thelodonts), including: a fixed open gape, reduced snout, and enlarged  
13 branchial region. However, no homology exists in individual skull elements between these taxa, and  
14 most of the modified elements in the mutant zebrafish occur outside known expression domains of  
15 *nkx3.2*. Therefore, we interpret the adult *nkx3.2* phenotype not as a reversal to an ancestral state, but as  
16 convergence due to similar functional requirement of feeding without moveable jaws. This remarkable  
17 convergence strongly suggests that jaw movements themselves dramatically influence the development  
18 of jawed vertebrate skulls, which implies that functionally viable skull morphologies are finite, with or  
19 without functional jaws. Because *nkx3.2* null zebrafish display prominent joint ankylosis, drastically  
20 modified skull shape, and altered feeding behaviors, these mutants provide a unique model with which  
21 to investigate mechanisms of skeletal remodeling and joint diseases.

22

## 23 INTRODUCTION

24 The jaw is a functionally versatile innovation that facilitated explosive diversification of gnathostomes  
25 (a clade containing jawed vertebrates), but its basic structure is surprisingly simple and highly  
26 conserved (Miyashita, 2016). A jaw consists of ‘a hinge and caps’: upper and lower skeletal levers  
27 hinged at a jaw joint (Depew and Simpson, 2006). As the joint enables biting motions, its origin is  
28 considered the final step in the evolutionary assembly of the vertebrate jaw (Cerny et al., 2010;  
29 Kuratani, 2012; Miyashita, 2016). Across jawed vertebrates, the presumptive jaw joint is marked by the  
30 expression of *nkx3.2*, an NK2 class homeobox gene (a.k.a. *bapx*), at the midheight of the embryonic  
31 mandibular arch (Gillis et al., 2013; Lukas and Olsson, 2018a; Miller et al., 2003; Tucker et al., 2004).  
32 Chondrogenesis dorsal to this expression domain gives rise to a palatoquadrate (upper jaw), whereas  
33 chondrogenesis ventral to it forms Meckel’s cartilage (lower jaw) (Medeiros and Crump, 2012). This  
34 basic pattern remains conserved among jawed vertebrates, but later development varies. Marginal

35 bones arise intramembranously around the often endo-/peri-chondrally ossified jaw cartilages except in  
36 chondrichthyans (sharks, rays, and skates) (Hall, 2015). In mammals, the jaw joint instead forms  
37 between two such intramembranous bones (temporal and dentary), whereas the proximal jaw joint  
38 becomes the malleus-incus interface that is, in mice, no longer affected by *Nkx3.2* knockout (Tucker et  
39 al., 2004). Despite these variations after pharyngeal chondrogenesis, no gnathostome lineage  
40 secondarily lost functional jaws.

41 By studying functional jaw loss in our new mutant zebrafish, we asked whether — and how —  
42 jaw functions affect vertebrate skull shape during development. Clinically documented agnathia in  
43 humans typically accompanies severe congenital disorders such as holoprosencephaly and otocephaly,  
44 but jaw loss is clearly a secondary effect and not a cause in these cases (Bixler et al., 1985; Brown and  
45 Marsh, 1990; Gekas et al., 2010; Schiffer et al., 2002). Instances of temporomandibular joint ankylosis  
46 (stiffening due to bone fusion) may result from trauma or infection, or may be congenital (Adekeye,  
47 1983; Chidzonga, 1999; Manganello-Souza and Mariani, 2003). If untreated, the ankylosis can lead to  
48 the ‘bird face’ deformity (El-Sheikh et al., 1996). However, these cases do not fully document the  
49 effects of functional jaw loss. In mammalian models, various jaw/skull deformations have been  
50 induced by surgical resection, detachment, or repositioning of the jaw muscles and/or bones (Bayram et  
51 al., 2010; Gomes et al., 2012; Horowitz and Shapiro, 1955; Lifshitz, 1976; Miyazaki et al., 2016;  
52 Rodrigues et al., 2009; Sarnat, 1970; Sarnat and Muchnic, 1971; Toledo et al., 2014). These  
53 manipulations occurred well after formation of the jaw skeleton and muscles, and the jaws remained  
54 partially functional because of unilateral operations or non-comprehensive disruption. The defects and  
55 deformities reported in these studies imply: a) jaw movements are potentially an important factor in  
56 shaping the skulls; and b) any allele disrupting jaw movements would be generally maladaptive.  
57 Nevertheless, these implications are difficult to explore without an accessible experimental model.

58 To fill this gap, we engineered two distinct null alleles of *nkx3.2* in zebrafish. Previously,  
59 transient knockdown of *nkx3.2* during early development (using morpholinos) had shown fusion of the  
60 nascent jaw cartilages in both zebrafish and frogs (Lukas and Olsson, 2018a; Miller et al., 2003). We  
61 confirmed in zebrafish that the mutants reproduce this phenotype. Surprisingly, mutant zebrafish are  
62 viable — despite loss of the jaw joint — and grow through to adulthood. Functionally jawless as a  
63 result, *nkx3.2*<sup>-/-</sup> zebrafish dramatically alter skull shape late in ontogeny to facilitate feeding, with the  
64 mouth fixed open, the snout reduced, and the branchial region expanded. This open-mouth phenotype,  
65 previously unknown in zebrafish or any other jawed vertebrates, also occurred in two extinct lineages  
66 of 400-million-plus year-old jawless vertebrates, anaspids and thelodonts. Even though they share no  
67 homology in individual facial bones, *nkx3.2*<sup>-/-</sup> fish accommodate loss of a functional jaw by converging

68 onto these ancient, distantly related agnathan head shapes. Thus, *nkx3.2* mutant zebrafish provide a  
69 unique model for both skeletal remodeling and joint diseases such as osteoarthritis, and to reevaluate  
70 evolutionary implications of phenocopies in general.

71

## 72 **MATERIALS AND METHODS**

73

### 74 **Animal Ethics**

75 Zebrafish maintenance and experiments were approved as protocol number AUP00000077 by the  
76 Animal Care and Use Committee: Biosciences at the University of Alberta as dictated by the Canadian  
77 Council on Animal Care. Other zebrafish work was approved by the University of Southern California  
78 Institutional Animal Care and Use Committee.

79

### 80 **Animal husbandry**

81 Embryos were incubated at 28 °C, and treated with 0.003% PTU (1-phenyl-2-thiourea) in 10% Hank's  
82 saline starting at 24 hpf. Larvae were introduced to the nursery at 1 week to 10 dpf. Genomic DNA was  
83 extracted from clipped fins of 3-5 dpf larvae or from adults. Preserved tissues, embryos, larvae, and  
84 adults were all fixed in 4% PFA, and stored in 100% EtOH or MeOH at -20 °C except for adults  
85 (preserved in 70% EtOH at 4 °C).

86

### 87 **Molecular genetics**

88 *Nkx3.2* protein is a transcription factor with a homeobox DNA binding domain that is 100% conserved  
89 in amino acid sequence among zebrafish, mouse, and human homologs. In zebrafish, a single *nkx3.2*  
90 gene is apparent in the genome, and its homology to mammalian *NKX3.2* is strongly supported by gene  
91 synteny: e.g. the neighbor genes flanking *nkx3.2* on zebrafish Chromosome 14 (*wdr1* and *bod111*) are  
92 positioned coordinately in mouse, human and spotted gar.

93 Two disparate regions of the gene were targeted by CRISPR guide RNA (gRNA) or TALENs,  
94 producing two disparate null alleles that produced similar phenotypes (Fig. 1A). One allele (ua5011)  
95 was engineered with CRISPR/Cas9 (Gagnon et al., 2014) targeted at the beginning of the  
96 homeodomain, and it harbors a 20 bp deletion resulting in a frameshift (Fig. 1A; Data Supplement 1).  
97 The disrupted translation of codons is predicted to abrogate production of the critical homeobox  
98 domain, and instead produce random amino acids. This is predicted to produce a non-functional  
99 *Nkx3.2* and a null allele. A disparate allele (el802) was generated using TALENs (Barske et al., 2016)  
100 targeted at the start of the gene. This produced a stably inherited gene with 20 bp deletion, removing



101 the translation start codon (Fig. 1A). The allele *nkx3.2<sup>el802</sup>* is predicted to not produce Nkx3.2 protein.  
102 Morphologically, these two alleles are not readily distinguishable from each other (see Results).

103

#### 104 CRISPR

105 To generate *nkx3.2<sup>ua5011</sup>*, we designed sgRNA to five different targets near or within the *nkx3.2*  
106 homeodomain, which were all injected:

107 GGCGGCCATCTGACGTCGCT

108 GGCTGACGCCAGCAGATCGG

109 AAGCAGCGGAAGAAGCGCTC

110 GAGCGCTTCTTCCGCTGCTT

111 GGCCGCGTTCTCCCACGCGC

112 These targets were selected using the web resource CHOPCHOP (Labun et al., 2016; Montague et al.,  
113 2014). Following the protocol developed by Gagnon and colleagues (2014), two different  
114 oligonucleotides were ordered: one containing a target sequence led by the SP6 promoter  
115 (ATTTAGGTGACACTATA) and followed by the overlapping region  
116 (GTTTTAGAGCTAGAAATAGCAAG) of the reverse oligonucleotide; and the reverse containing the  
117 constant, Cas9-binding domain of sgRNA. These oligonucleotides were annealed after 5-minute  
118 incubation at 95°C, through graded cooling (-2°C s<sup>-1</sup> to 85°C; -0.1°C s<sup>-1</sup> to 25°C), and filled in for the  
119 non-overlapping regions using T4 DNA polymerase (NEB: M0203S). To synthesize sgRNAs using  
120 these templates, MegaScript™ SP6 Transcription Kit (Ambion: AM1330) was used. The RNAs were  
121 precipitated in ammonium acetate solution, suspended in UltraPure™ H<sub>2</sub>O, and stored in 2-3 μl  
122 aliquots at -80 °C. For injection, sgRNA(s) were diluted to 400-600 ng μl<sup>-1</sup>, with 1 μl mixed with 1 μl  
123 aliquot of Cas9 nuclease from *Streptococcus pyogenes* (NEB: #M0646) at 1 μg ml<sup>-1</sup>. This solution was  
124 mixed with 3 μl of 0.2M KCl, 0.2 % phenol red, and ddH<sub>2</sub>O. The final injection volume per embryo  
125 was approximately 5 nl, with 400-600 pg sgRNA and 1 ng Cas9 nuclease. For control, GFP 5'GA was  
126 used at the stage P<sub>0</sub> when ubi:switch/RH+AB was crossed, which can be phenotyped by reduction of  
127 ubiquitous GFP in the progenies with dsRed expression in heart.

128 We generated *nkx3.2<sup>ua5011</sup>* against AB background. Cas 9 and sgRNAs targeted for *nkx3.2* were  
129 coinjected with sgRNA that disrupts GFP GA5' (CTCGGGCTGAAGCTCGGCG), at stages between  
130 fertilization and first cleavage, to fertilized eggs collected from the crossing of ua3140  
131 ubi:switch/AB+RH and the background AB line. At 3 dpf, injected larvae were sorted for reduced  
132 expression of ubiquitous GFP and the presence of dsRed fluorescence in heart. These larvae provided  
133 the P<sub>0</sub> population. Sequencing of genomic DNA extracted from fin clips of the P<sub>0</sub> adults identified a

134 female with a 20 bp deletion to the homeodomain-coding region of *nkx3.2* (ua5011). The P<sub>0</sub> female  
135 carrying this mutation was crossed to the *sox10*:GFP transgenic line, and progenies were sorted at 3 dpf  
136 for the presence of *sox10*:GFP expression and the absence of the two markers (ubiquitous GFP  
137 expression and red fluorescent heart). ua5011 heterozygotes were identified by both sequencing of  
138 extracted gDNA and Restriction Fragment Length Polymorphism (RFLP) analysis using one XmaI  
139 (NEB: R01805) restriction site within the deleted region (primers for genotyping: 5'–  
140 GGACGAGACGGATCAGGAATC–3'; 5'–CACTCGGCGTGTTCGGTAAA–3'). These F<sub>1</sub>  
141 heterozygotes were incrossed for F<sub>2</sub> embryos, which were genotyped by RFLP analysis and phenotyped  
142 at 4 dpf by identifying *sox10*:GFP-positive chondrocytes and staining cartilages using alcian blue.  
143 Homozygotes were reared with a strictly small-grained diet to the adult stage. In this study,  
144 *nkx3.2*<sup>ua5011/ua5011</sup> represent F<sub>2</sub> generation derived from the P<sub>0</sub> mutant female and a wildtype male (AB;  
145 *sox10*:GFP), whereas comparative wildtype (AB; *sox10*:GFP) come from incrossing of half-siblings of  
146 the P<sub>0</sub> male.

147

#### 148 **Tissue preparation and histology**

149 One- and two-month-old *nkx3.2*<sup>+/+</sup> and *nkx3.2*<sup>-/-</sup> zebrafish were fixed in 4% paraformaldehyde for  
150 24hrs. Zebrafish were eviscerated prior to decalcification with 0.5M ethylenediaminetetraacetic acid  
151 (EDTA) solution for 4 weeks. Samples were dehydrated post decalcification in a series of graded  
152 ethanol and embedded in paraffin. Tissue blocks were embedded in a sagittal orientation and sections  
153 were cut at 7µm using a 820 Spencer microtome. Hematoxylin and eosin staining was performed on  
154 zebrafish sections by firstly placing sections in an oven at 60 °C for 10 min. The deparaffinized  
155 sections were rehydrated using xylene and graded ethanol (100%, 95%, 70%), followed by staining  
156 with hematoxylin and eosin. The slides were then dehydrated and mounted using Permount.

157

#### 158 **Skeletal preparation**

159 Alcian blue staining of cartilages partly followed the protocol provided by Michael Shapiro (University  
160 of Utah). Specimens fixed in 4% PFA were rinsed with ddH<sub>2</sub>O and transferred to 70% EtOH. Once  
161 equilibrated, larvae were immersed in alcian blue solution (0.167 mg/ml alcian blue; 15% acetic acid;  
162 70% EtOH), rinsed through EtOH/ddH<sub>2</sub>O series, and washed in a saturated sodium borate solution.  
163 Specimens were immersed in trypsin solution (0.125% trypsin; 30% sodium borate) overnight, washed  
164 in 1% KOH solution, bleached in 0.15% H<sub>2</sub>O<sub>2</sub> 0.1% KOH, 25% glycerol solution, immersed through a  
165 1% KOH/glycerol graded series into 100% glycerol for storage. Specimens older than 21 dpf were

166 immersed in 0.005% alizarin red solution in 1% KOH overnight, after the first 1% KOH wash and  
167 before bleaching in 0.15% H<sub>2</sub>O<sub>2</sub> 0.1% KOH.

168

### 169 **Filming**

170 Wildtype (AB; *sox10*:GFP) and *nkx3.2*<sup>ua5011/ua5011</sup> were filmed at 2 months post fertilization to record  
171 feeding behavior (Movie S1). A fish was placed in a 1.4L tank with dark background and given brine  
172 shrimp larvae. Feeding was filmed using Canon EOS 760D at 30 frames s<sup>-1</sup> in dimensions 1280 × 720  
173 pixels. The films were cropped and assembled using iMovie (ver. 10.1.9, © 2001-2018 Apple Inc.) and  
174 slowed to 1/10 original speed.

175

### 176 **Imaging**

177 *Micro-computed tomography (μCT)*. Two-month-old zebrafish were scanned using MILabs μCT  
178 scanner. Scans were reconstructed at a voxel size of 25μm. Images were analyzed using AVIZO 3-  
179 dimensional software (Milabs, Utrecht, Netherlands). 2-Dimensional images used for linear and  
180 geometric morphometrics were obtained from AVIZO.

181

182 *Microscopy*. Fluorescent images were acquired on a Zeiss Axio Observer.Z1 with LSM 700 confocal  
183 microscope via ZEN 2010 software (version 6.0, Carl Zeiss MicroImaging, Oberkochen). Brightfield  
184 imaging of stained preps was performed on a Leica MZ16F dissection microscope (Concord ON,  
185 Canada) with 12.8 megapixel digital camera (DP72, Olympus; Richmond Hill ON, Canada).

186

### 187 **Morphometrics**

188 *Rationales for morphometric comparison*. The purpose of our quantitative comparison is to test  
189 phenotypic similarities and differences qualitatively identified in *nkx3.2*<sup>-/-</sup> mutants with respect to  
190 wildtype zebrafish and anaspids (and thelodonts for gape angles). On the one hand, the skulls of *nkx3.2*<sup>-/-</sup>  
191 mutants clearly depart from wildtype morphologically at adult stage (Fig. 2). To describe this  
192 morphological departure in greater details, we will present comparison of skeletal growth between  
193 *nkx3.2*<sup>-/-</sup> and wildtype elsewhere. On the other hand, it is difficult to assess observed similarities  
194 between *nkx3.2*<sup>-/-</sup> phenotype and the general head configuration in anaspids. Zebrafish and anaspids are  
195 distant to each other phylogenetically: the former is nested deep within, in the ascending order,  
196 cypriniforms, teleosts, neopterygians, actinopterygians, osteichthyans, and gnathostomes, whereas  
197 anaspids represent either a stem gnathostome or even a stem cyclostome lineage (Donoghue et al.,  
198 2000; Janvier, 2007, 1996; Keating and Donoghue, 2016; Miyashita et al., 2019). The dermatocranium

199 of a zebrafish is macromeric, although that of an anaspid is largely micromeric with scales of acellular  
200 bone (Blom et al., 2001). There is no morphological correspondence in individual elements of the skull  
201 roof between zebrafish and anaspids. The parabranial cavity is closed by the operculum in zebrafish,  
202 whereas each branchial pouch had its own outlet in the series of external pores in anaspids (Blom et al.,  
203 2001). A single gene mutation in *nkx3.2* did not reverse these, and other morphological differences  
204 accumulated after the last common ancestor of zebrafish and anaspids. For morphometric comparison,  
205 we chose metric traits that can be identified in both zebrafish and anaspids.

206

207 *Linear morphometrics.* The fixed open gape is similar between *nkx3.2*<sup>-/-</sup> mutants and anaspids. We  
208 compared this trait by taking the angle between supporting skeletal elements of the upper and lower  
209 lips in both taxa. In zebrafish, the angle was taken by extrapolating the axis of the premaxilla until it  
210 meets the axis of the dentary. At stages younger than the onset of dermal ossification (4 and 14 dpfs),  
211 the angle was measured between the axes of the palatal process (palatoquadrate) and Meckel's  
212 cartilage. In anaspids, the upper and lower lips are demarcated by a series of plates or relatively larger  
213 scales, which allowed delineation of the gape angle (measured at where the extrapolated upper and  
214 lower lip margins meet). The angle was measured similarly in thelodonts, except that the lip margins  
215 were identified along the series of small marginal scales. Gape angle exhibits a roughly normal  
216 distribution within each of the age class of both *nkx3.2*<sup>-/-</sup> and wildtype zebrafish and among anaspids  
217 (see Data Supplement 2). In addition to gape angles, we measured lengths of skulls and lower jaws in  
218 zebrafish, and orbit diameter in anaspids and thelodonts. Original measurements are available in Data  
219 Supplement 2.

220 In *nkx3.2*<sup>-/-</sup> zebrafish, the gape angle increases progressively with age, and thus with increasing  
221 body size. Anaspids and thelodonts overall have much greater range of body size than zebrafish. Unlike  
222 *nkx3.2*<sup>-/-</sup> zebrafish, however, the gape angle appears to vary independently of body size in anaspids. No  
223 correlation exists between gape angle and orbit diameter in anaspids, regardless of whether among  
224 those specimens falling in the size range of zebrafish or across the entire clade ( $r = -0.114$ ;  $P = 0.306$ ).  
225 Although eye size is generally negatively allometric in vertebrates (Howland et al., 2004), the orbit  
226 diameter is one reliable, structurally intact metric trait in this clade, because most specimens are not  
227 preserved in entire body length, and because other reference measurements (e.g., body height) are  
228 affected by taphonomic deformation or simply not preserved in most specimens (Blom et al., 2001;  
229 Blom and Märss, 2010; Janvier, 1996; Sansom et al., 2010). In thelodonts, the relationship remains to  
230 be tested between body size and gape angles because of small sample size ( $n = 5$ ).

231

232 *Geometric morphometrics*. Eight landmarks were assigned to both zebrafish (2 mpf) and anaspid  
233 samples for geometric morphometric comparison. These landmarks capture general configuration of  
234 the heads (1: anterior tip of upper lip; 2: junction between upper and lower lips; 3: anterior tip of lower  
235 lip; 4: nostril, or nasohypophyseal opening; 5: anterior extremity of orbit; 6: posterior extremity of  
236 orbit; 7: trunk-head boundary at dorsal outline; 8: ventral point of hypobranchial region). These  
237 landmarks describe structures homologous across vertebrates (landmarks 4, 5, 6) or geometrically  
238 determined positions comparable across vertebrates. They are free of morphological discontinuity  
239 between anaspids and gnathostomes (none of the landmarks represents anaspid- or gnathostome-  
240 specific morphology). TpsDig (Rohlf, 2018) was used to place landmarks on two-dimensional images  
241 of anaspid and zebrafish. The digitized file was entered into MorphoJ software (Klingenberg, 2011)  
242 and all images were aligned using the anterior and posterior extremity of the orbits. These landmark  
243 data were transformed using the procrustes superimposition method (Rohlf, 1999), and the resulting  
244 coordinates were compared using Principal Component Analysis (PCA). In PCA, PC scores from  
245 anaspid, *nkx3.2<sup>+/+</sup>* and *nkx3.2<sup>-/-</sup>* zebrafish were grouped by equal frequency ellipses with a P value of  
246 0.95.

247

248 *Rationales for selection of comparative taxa in geometric morphometrics*. From the pool of nearly a  
249 thousand catalogued specimens of anaspids, we selected a total of 70 specimens that show lateral  
250 compression during the fossilization process, with the least taphonomic artifact, to reflect lateral view  
251 of the heads. Furcacauidi thelodonts were excluded from geometric morphometrics because only a  
252 handful of exceptionally preserved specimens are available. The sample size is small for this latter  
253 group ( $n < 5$ ), and all such specimens were collected from a single locality, making it difficult to  
254 identify (and thus control for) taphonomic artifacts. In addition, landmarks cannot be assigned  
255 confidently in this group. The nasohypophyseal opening cannot be located precisely because of the  
256 micromeric nature of the integument on the dorsal side of the head (Wilson and Caldwell, 1998, 1993).  
257 The transition from head to trunk is ambiguous along the dorsal outline because there is no apparent  
258 change in morphology of the scales (Wilson and Caldwell, 1998, 1993).

259 There are many other lineages of jawless vertebrates, including living cyclostomes,  
260 heterostracans, thelodonts, galeaspids, pituriaspids, and osteostracans, in the order of nested hierarchy  
261 toward the crown-group gnathostomes (Janvier, 2007, 1996). Living cyclostomes are difficult to  
262 compare as they have an anguilliform profile and lack ossified skeletons, or cartilages unambiguously  
263 comparable to the jaw/lip elements of the zebrafish skull (Miyashita, 2016, 2012; Miyashita et al.,

264 2019). Extinct jawless vertebrates generally have a depressiform profile (Janvier, 1996). Therefore,  
265 direct shape comparison is difficult with the compressiform zebrafish and anaspids.  
266 Among non-depressiform jawless stem gnathostomes, the lips are typically preserved poorly.  
267 Furcaudiid thelodonts have a lateromedially compressed body profile, and have the lip morphology  
268 consistent with that of anaspids (Wilson and Caldwell, 1998, 1993). These similarities suggest that  
269 depressed lower lips are a general condition along the gnathostome stem, as reconstructed  
270 conventionally across the stem group.

271

## 272 RESULTS

273

### 274 Jaw joint is ankylosed in *nkx3.2* null alleles

275 At 4 days post fertilization (dpf), *nkx3.2*<sup>-/-</sup> zebrafish replicated the *nkx3.2* morpholino knockdown  
276 phenotype: the absence of a jaw joint (Miller et al., 2003). The palatoquadrate and Meckel's cartilage  
277 fused together, and the retroarticular process was absent (Fig. 1D, G, I). Apart from joint ankylosis, no  
278 marked differences were apparent in overall morphology or survival rates between *nkx3.2*<sup>-/-</sup> mutants  
279 and wildtype (some minor difference in skull size and lower jaw proportions are discussed in the next  
280 section). Heterozygotes were morphologically indistinguishable from wildtype (Fig. 1C, F), and the  
281 *nkx3.2* alleles displayed recessive Mendelian inheritance (F<sub>2</sub> genotypes followed Mendelian ratio;  
282 heterozygotes developed wildtype morphology). Remarkably, these functionally jawless homozygous  
283 mutants survived beyond early larval stages.

284

### 285 Functionally jawless *nkx3.2*<sup>-/-</sup> zebrafish modify skull shapes late in ontogeny

286 Contrary to the maladaptive nature of jaw dysfunctions in general, *nkx3.2*<sup>-/-</sup> zebrafish continued to grow  
287 without a jaw joint. Marked phenotypic differences against wildtype began to emerge between the 2<sup>nd</sup>  
288 and 3<sup>rd</sup> weeks post fertilization (Fig. 2). The lower jaw became downturned in *nkx3.2*<sup>-/-</sup> fish resulting in  
289 a rigidly fixed open mouth, whereas both upper and lower jaws were upturned in wildtype zebrafish  
290 (Fig. 2A, B). This timing coincides with the onset of ossification and the period of active feeding in  
291 normal juveniles (Cubbage and Mabee, 1996; Kimmel et al., 1995). Although the palatoquadrate and  
292 Meckel's cartilage remained fused in *nkx3.2*<sup>-/-</sup> mutants, skeletal staining reveals that the upper and  
293 lower jaw elements ossified independently of each other — still without a ball-and-socket joint  
294 structure (Fig. 3A, B). All skull elements in *nkx3.2*<sup>-/-</sup> mutants ossified without apparent delay.

295 The lower jaws were increasingly turned downward in *nkx3.2*<sup>-/-</sup> by the end of the first month,  
296 resulting in a greater gape (Fig. 2D, E). The jaw joint was still absent in *nkx3.2*<sup>-/-</sup> mutants: a sheet of



297 perichondrium lies between the ossifying quadrate and articular — so the two bones remained distinct  
298 elements — but this interface had none of those essential components of synovial diarthrosis (Fig. 3D,  
299 E). Many other osteological differences emerged by this stage. Normally, the premaxilla and the  
300 maxilla swing forward to sit nearly vertical and are hinged by the kinethmoid for suction feeding  
301 (Hernandez, 2000; Hernandez et al., 2007) (Fig. 2C). In *nkx3.2<sup>-/-</sup>* mutants, however, the premaxilla and  
302 the maxilla became oriented posteroventrally and abutted against the anterior margin of the orbit (Fig.  
303 2D). The kinethmoid was reduced into a fused bony process, unlike a rod-like hinge element in  
304 wildtype (Hernandez et al., 2007). The downturned lower jaws of the *nkx3.2<sup>-/-</sup>* mutants were relatively  
305 shorter than the normal lower jaws of wildtypes. The basihyal protruded anteroventrally as much as the  
306 lower jaw, implying that the muscle connecting those two elements (m. intermandibularis posterior)  
307 (Schilling and Kimmel, 1997) may be responsible for the lower jaw orientation. As a result of these  
308 modifications, *nkx3.2<sup>-/-</sup>* mutants had a shorter snout, a fixed open gape, and a dorsoventrally tall profile.

309 Linear morphometrics corroborated the departure from normal morphology in *nkx3.2<sup>-/-</sup>* mutants  
310 in the latter half of the first month (14 dpf onward). For absolute size, no significant difference ( $P >$   
311 0.05) in skull length emerged between wildtype and *nkx3.2<sup>-/-</sup>* mutants except at 4 dpf ( $t = 2.202$ ;  $P =$   
312 0.338) (Fig. 4B). Also at this stage, the lower jaws appear to be shorter relative to skull length in the  
313 mutants than in the wildtypes ( $t = 2.809$ ;  $P = 0.0078$ ) (Fig. 4C). These minor but statistically significant  
314 differences at 4 dpf may be a direct consequence of the ankylosis between palatoquadrate and Meckel's  
315 cartilage. By the second week, however, differences between the mutants and wildtypes became non-  
316 significant in these metric traits. The lower jaw depression (gape angle  $> 45^\circ$ ) in the mutants was  
317 pronounced at 21 dpf ( $t = -11.834$ ;  $P \ll 0.01$ ) (Fig. 4A), but proportional changes to lower jaw lengths  
318 in the same mutants were only expressed in significant magnitude at 1 month (21 dpf:  $t = 1.7225$ ;  $P =$   
319 0.091559; 30 dpf:  $t = 10.56$ ;  $P \ll 0.01$ ) (Fig. 4C). This lag between the two traits indicates that the rate  
320 of skeletal growth in the jaws followed changes in their orientation for a greater gape (and thus  
321 resulting in functional shift). Morphological variations within a cohort of *nkx3.2<sup>-/-</sup>* mutants were greater  
322 at this stage than in any other, as indicated by the range of variation in orientations and relative lengths  
323 of the lower jaws (Fig. 4A, C).

### 324 325 **The adult *nkx3.2<sup>-/-</sup>* phenotype accommodates functional jaw loss**

326 At 2 months of age and approaching sexual maturity nearly all *nkx3.2<sup>-/-</sup>* mutants had a gape angle  
327 greater than 90 degrees (Fig. 4A). These *nkx3.2<sup>-/-</sup>* adults continued to be characterized by the  
328 morphological differences identified at 1 mpf. The nostrils sat between the eyes because the snout was  
329 reduced in length relative to wildtype zebrafish. The skulls appeared to be more highly ossified in



330 *nkx3.2*<sup>-/-</sup> mutants than in wildtype, where massive bones and cartilages were identified around the  
331 interface of quadrate and articular, in the lower branchial region, and in the laterally expanded  
332 operculum (Figs. 2J, G, M, N, 5B; Movie S1). All homozygous mutants showed the descriptive skeletal  
333 traits identified here. Morphologically, the phenotypic effects of the two alleles (*nkx3.2*<sup>ua5011</sup> and  
334 *nkx3.2*<sup>el802</sup>) were virtually indistinguishable from each other at respective ages (Fig. 2G, J), given  
335 variations within a strain (for examples, see variation in gape angles, relative lengths of lower jaws, or  
336 sexual dimorphism in *nkx3.2*<sup>ua5011</sup>: Figs. 2M, N, 4A, C).

337 With their modified skulls, adult *nkx3.2*<sup>-/-</sup> mutants exhibited feeding behaviors markedly  
338 different from wildtype (Fig. 5; Movie S1). Wildtype zebrafish feed by suction using rapid lower jaw  
339 depression and a forward swing of the mobile premaxilla-maxilla complex shortly followed by opening  
340 of the operculum (Fig. 5A), consistent with general teleost feeding mechanics (Alexander, 1970, 1969;  
341 Lauder, 1980, 1979; Westneat, 2005, 2004). In contrast, adult *nkx3.2*<sup>-/-</sup> mutants were constrained by the  
342 fixed upper jaw unit and open gape. They instead showed ram feeding behaviors (swimming through  
343 food) (Fig. 5B). The jaws remained fixed, and no significant dorsoventral movement was observed.  
344 Whereas in wildtype one complete cycle of the jaw opening and closing took approximately 80  
345 milliseconds (and approximately a tenth of a second to the closure of the operculum), *nkx3.2*<sup>-/-</sup> mutants  
346 required double that time from changing direction of swimming toward food (0 s) to doing so again  
347 away from the food (0.2 s) in this particular feeding episode in Fig. 5B. A detailed analysis of the  
348 feeding mechanics is beyond the scope of this paper and is currently the focus of our study, with  
349 filming at higher speed and resolution.

350 This ram-feeding behavior was correlated with skull remodeling in *nkx3.2*<sup>-/-</sup> mutants. In  
351 zebrafish skulls, the bones form endochondrally (quadrate, anguloarticular, basihyal) or  
352 intramembranously (premaxilla, maxilla, dentary, jugal, opercular, preopercular) (Cubbage and Mabee,  
353 1996; Schilling and Kimmel, 1997). Much of the skeletal remodeling observed in adult *nkx3.2*<sup>-/-</sup>  
354 mutants occurred in the intramembranous bones — spatially and temporarily well outside the known  
355 expression domain of *nkx3.2* (Askary et al., 2017; Miller et al., 2003). Until past 1 mpf, the fusion  
356 between jaw cartilages was not completely ossified in these mutants, potentially allowing plastic  
357 remodeling (Fig. 2e, l). These observations suggest that *nkx3.2*<sup>-/-</sup> zebrafish accommodate functional  
358 jawlessness through remodeling of the skull and changes to feeding behavior.

359  
360 ***nkx3.2*<sup>-/-</sup> zebrafish converge onto agnathans in overall head shapes**

361 Through this dramatic remodeling of the skull, *nkx3.2*<sup>-/-</sup> zebrafish assumed a head shape reminiscent of  
362 two lineages of extinct jawless vertebrates that have laterally compressed body profiles: 1) birkeniiform

363 anaspids (Fig. 6C), stem cyclostomes known mostly from the Silurian period (Blom et al., 2001;  
364 Miyashita et al., 2019); and 2) furcacaudiid thelodonts (Fig. 6D), much more elusive stem  
365 gnathostomes known from the Silurian and Devonian periods (Märss et al., 2007; Wilson and Caldwell,  
366 1998). Qualitatively, the resemblance is particularly striking in overall head shape characters,  
367 including: fixed gape (depressed lower lips), shortened snout, interorbital position of nostril,  
368 proportionally large branchial region, and massive parietal region behind the occiput.

369 In linear morphometrics, the gape angle between upper and lower lips reveals that *nkx3.2*<sup>-/-</sup>  
370 mutants closely resembles the anaspid- and thelodont-like conditions late in ontogeny (Fig. 4A). The  
371 trait in *nkx3.2*<sup>-/-</sup> mutants departed from that in wildtype after the onset of skull ossification and active  
372 feeding (14–21 dpf), and overlaps with the range occupied by anaspids and thelodonts in later stages (1  
373 and 2 mpf). When the jaws were at rest, the gape angle in wildtype zebrafish was consistently around  
374 30 degrees regardless of ontogenetic stages. This was also the case for the *nkx3.2*<sup>-/-</sup> mutants at 4 and 14  
375 dpf when they still rely on yolk as main or partial intake. The gape angle increased steadily thereafter  
376 in the mutants.

377 In landmark-based geometric morphometrics, *nkx3.2*<sup>-/-</sup> mutants aligned more closely with  
378 anaspids than wildtype along the principal components (PCs) that explain the adult phenotype (PCs 1  
379 and 5) (Fig. 6E, F). Nearly one third of the overall shape variation loaded on PC1 and primarily  
380 concerned anteroposterior length and dorsoventral height of the entire head. Compared to wildtype  
381 zebrafish, *nkx3.2*<sup>-/-</sup> mutants and most anaspids had a much shorter snout (with the lips and the nostrils  
382 shifting posteriorly toward the eye) and dorsoventrally deeper lower lips. PC 5 explained 7.0 % of  
383 overall shape variation, and the traits that vary along it were orientation of lower lip and relative height  
384 of nostrils, which clearly set wildtype zebrafish apart from *nkx3.2*<sup>-/-</sup> mutants and anaspids. On the  
385 Cartesian grid of PCs 1 and 5, *nkx3.2*<sup>-/-</sup> mutants overlapped with anaspids in morphospace occupation  
386 and apart from wildtype zebrafish (Fig. 6F). The area of overlap also indicated that *nkx3.2*<sup>-/-</sup> mutants  
387 are broadly similar to anaspids in these PCs, not just to one or a few individual anaspid taxa. PCs 2-4  
388 (not shown in Fig. 6) largely explain variation among anaspids or within wildtype/mutant zebrafish  
389 samples and were therefore uninformative for comparison between the groups (datasets containing  
390 landmark coordinates and Procrustes transformation are provided in Data Supplement 3).

391

## 392 **DISCUSSION**

393

### 394 **Mutants corroborate the function of *nkx3.2* in joint development**

395 Our *nkx3.2*<sup>-/-</sup> zebrafish reinforce the morphant-based insight that this transcription factor is essential to  
396 the development of jaw joint in non-mammalian vertebrates (Miller et al., 2003). This is likely the  
397 widespread condition among jawed vertebrates. *Nkx3.2* knockdown also results in fusion between the  
398 palatoquadrate and Meckel's cartilage in amphibians (Lukas and Olsson, 2018a), and a similar  
399 phenotype is observed in chicks with ectopic expression of BMP4 and FGF8 that repressed *Nkx3.2*  
400 (Wilson and Tucker, 2004). In mammals, the palatoquadrate (malleus) and Meckel's cartilage (incus)  
401 migrate to form middle ear ossicles. The malleus-incus joint is not affected in *Nkx3.2*<sup>-/-</sup> mice, even  
402 though the malleus becomes narrower in the mutants, and even though *Nkx3.2* plays a role in  
403 specification of the gonium and the anterior tympanic ring (Tucker et al., 2004). Aside from the head,  
404 *Nkx3.2* plays a role in various structures in mice and chicks, including the axial column (Herbrand et  
405 al., 2002; Lettice et al., 2001; Murtaugh et al., 2001) and visceral lateralities of the spleen and pancreas  
406 (Hecksher-Sørensen et al., 2004; Schneider et al., 1999). We will test in a forthcoming work whether or  
407 not *nkx3.2*<sup>-/-</sup> zebrafish have parallel phenotypes to these amniote mutants in the axial skeletons or  
408 visceral lateralities.

409 During development of the jaw joint, *nkx3.2* is thought to specify the joint interzone by  
410 inhibiting maturation or hypertrophy of the chondrocytes (Miller et al., 2003; Smeeton et al., 2016).  
411 Similar functions have been ascribed to *irx7* and *irx5a* in the hyoid joint (Askary et al., 2015). This is  
412 consistent with the predicted regulatory function of *Nkx3.2* in vertebral development, intervertebral and  
413 interphalangeal joint formation, or somatic chondrogenesis in general (Herbrand et al., 2002; Lettice et  
414 al., 2001; Murtaugh et al., 2001) — via repression of *Runx2*, by upregulating *Col2a1*, and/or through a  
415 positive feedback loop with *Sox9* (Smeeton et al., 2016). These insights are based on: a) experimental  
416 results using amniote embryos or somitic mesodermal cell cultures (Cairns et al., 2008; Kawato et al.,  
417 2012; Lengner et al., 2005; Murtaugh et al., 2001; Provot et al., 2006; Yamashita et al., 2009; Zeng et  
418 al., 2002); and b) clinical and genetic studies of human pathologies, including osteoarthritis and  
419 spondylo-megaepiphyseal-metaphyseal dysplasia (including pseudoepiphyses) (Caron et al., 2015;  
420 Hellemans et al., 2009). Before this study, however, no mutants were available to specifically address  
421 these potential mechanisms of *nkx3.2* functions in the mandibular arch.

422

### 423 **The open-mouth phenotype results from plastic remodeling**

424 The late onset and topology of skull/jaw remodeling suggests that *nkx3.2*<sup>-/-</sup> zebrafish accommodate the  
425 loss of the jaw joint via a plastic response. Other than the absence of jaw joint, *nkx3.2*<sup>-/-</sup> zebrafish  
426 appear normal until metamorphosis (14–21 dpf) (Fig. 1D, G). As the skull ossifies, however, the  
427 observed phenotype becomes increasingly prominent (Fig. 2B, D, G, J, M, N). Although the fused jaw

428 cartilages clearly result from *nkx3.2* mutation, *nkx3.2* loss-of-function, by itself, seems unlikely to yield  
429 all the rest of phenotypic effects described here. A genome-wide analysis suggests that *nkx3.2*  
430 patterning effects in the skull are restricted to the mid-portion of the mandibular arch (Askary et al.,  
431 2017). Nor does *nkx3.2* have known expression or function in the intramembranously ossified skull  
432 elements (Miller et al., 2003; Tucker et al., 2004), which are dramatically modified in our *nkx3.2*<sup>-/-</sup> fish.  
433 The hypertrophied mandibular cartilage may result from *nkx3.2* loss-of-function in regulating local  
434 chondrogenesis (Smeeton et al., 2016). Still, further investigation is warranted because in amphibians  
435 an ectopic cartilage formed in the mandibular arch with *Nkx3.2* overexpression, not repression (Lukas  
436 and Olsson, 2018b).

437 A comparative survey across vertebrates supports our interpretation of the adult *nkx3.2*<sup>-/-</sup>  
438 phenotype as skeletal remodeling to accommodate the jaw joint loss. Discrete variation in cichlid jaw  
439 morphology has an epigenetic basis in behaviorally mediated skeletal remodeling, where gaping  
440 frequencies in juveniles correlate with dimensions of the retroarticular process (Hu and Albertson,  
441 2017). The magnitude of morphological changes in the adult *nkx3.2*<sup>-/-</sup> phenotype also appears  
442 consistent with a series of surgical experiments in mammalian jaw skeletons (Bayram et al., 2010;  
443 Gomes et al., 2012; Horowitz and Shapiro, 1955; Lifshitz, 1976; Miyazaki et al., 2016; Rodrigues et  
444 al., 2009; Sarnat, 1970; Sarnat and Muchnic, 1971; Toledo et al., 2014) or with the ‘bird face’  
445 deformity observed in clinical cases of the temporomandibular joint ankylosis in humans (El-Sheikh et  
446 al., 1996). Collectively, these studies show that latent potentials of development allow a plastic trait to  
447 become expressed in jaw skeletons.

448 Variation resulting from developmental plasticities — whether induced by environmental cues,  
449 developmental perturbation, or mutation — are often non-random and adaptive (Palmer, 2012; West-  
450 Eberhard, 2005a, 2005b, 2003). Such non-random, adaptive responses are documented across wide  
451 ranges of taxa and structures, including: more robust claws in crabs fed with harder food items (Smith  
452 and Palmer, 1994); longer or shorter appendages of barnacles transplanted between wave-exposed and  
453 protected shores (Kaji and Palmer, 2017; Neufeld and Palmer, 2008); and thickened shells of  
454 gastropods exposed to predator cues (Appleton and Palmer, 1988; Edgell and Neufeld, 2008).  
455 Phylogenetically closer to zebrafish, cichlids have been extensively studied for developmental  
456 plasticity in jaw skeletons, such as: the relationship with gape frequencies and retroarticular processes,  
457 mentioned above (Hu and Albertson, 2017); antisymmetric development of the jaws in scale-eating  
458 specialists (Stewart and Albertson, 2010); and various dietary effects on feeding morphology (Galis,  
459 1993; Greenwood, 1965; Liem and Osse, 1975; Meyer, 1987; Wimberger, 1992, 1991). Ram feeding

460 facilitated by the fixed open gape in the adult *nkx3.2*<sup>-/-</sup> zebrafish corroborates non-random, adaptive  
461 accommodation of the jaw joint defect.

462

### 463 **Jaw joint functions constrain skull morphology in vertebrates**

464 The drastically remodeled skull of adult *nkx3.2*<sup>-/-</sup> zebrafish highlights jaw movements as an important  
465 factor in the development — and thus morphological diversity — of jawed vertebrate skulls (Depew et  
466 al., 2005; Depew and Compagnucci, 2008; Depew and Simpson, 2006). Functional jaw loss resulting  
467 from *nkx3.2*-null mutations allowed the mutants to depart so markedly in morphology from their  
468 wildtype cousins, despite the nearly identical genetic backgrounds. This departure implies that  
469 movements at the jaw joint limit skull forms. The specific combination of traits observed in adult  
470 *nkx3.2*<sup>-/-</sup> zebrafish — e.g., nostrils in interorbital position, premaxilla and maxilla abutted against  
471 antorbital wall, kinethmoid reduced, basihyal protrusion — is likely maladaptive and unavailable to  
472 zebrafish when the jaws function properly. Simultaneously, the absence of a jaw joint (or jaw apparatus  
473 altogether) also limits functionally viable forms. This interpretation is bolstered by the superficial  
474 convergence in head shapes between *nkx3.2*<sup>-/-</sup> zebrafish and two Paleozoic agnathan lineages (anaspids  
475 and furcacaudiform thelodonts). The *nkx3.2*<sup>-/-</sup> zebrafish and these agnathans share a functional  
476 requirement — the absence of a hinge joint between upper and lower lips — and transversely  
477 compressed body profile. No evidence suggests any more similarities in the otherwise wildtype-like  
478 young mutants (Fig. 1D, G) until the lower jaw skeletons begin rotating posteroventrally post 14 dpf  
479 (Fig. 2B, D). Therefore, we interpret the anaspid/thelodont-like traits in the adult *nkx3.2*<sup>-/-</sup> zebrafish not  
480 as recapitulations of conserved, genetically hard-wired early vertebrate development (atavism), but  
481 rather as parallel developmentally plastic responses to shared growth conditions that were experienced  
482 by early vertebrates in a zebrafish skull (convergence).

483 Thus, jaw-joint loss (*nkx3.2* loss-of-function phenotype) released *nkx3.2*<sup>-/-</sup> zebrafish from  
484 developmental constraints to facilitate jaw movement, and exposed them to a different functional  
485 requirement: feeding without mobile jaws. A fixed open gape — accompanied by modification of the  
486 skull elements — is one morphological solution to the functional loss of the jaw joint, which is  
487 corroborated by ram feeding exhibited by *nkx3.2*<sup>-/-</sup> mutants (Fig. 5B; Movie S1). The magnitude of  
488 modification documented post-hatching (Figs. 1–5) is a testament to significant functional optimization  
489 within the bounds of the gnathostome bauplan. Simultaneously, well-constrained occupancy by the  
490 *nkx3.2*<sup>-/-</sup> in the PCA plot (Fig. 6F) implies that alternative morphological patterns are either  
491 functionally non-viable (e.g., fixed closed gape) or developmentally non-accessible (e.g., ectopic  
492 formation of a mouth). Thus, the *nkx3.2*<sup>-/-</sup> mutants provide a rare case study. The results suggest that



493 the vertebrate bauplan allows a limited repertoire of functionally viable morphological patterns, onto  
494 which forms may converge under a given functional constraint.

495 In support of our interpretation, remarkable convergences arise via developmental plasticity  
496 under similar functional requirements — even in the absence of homology in individual skeletal  
497 elements — between taxa widely separated chronologically and phylogenetically. Bichirs (*Polypterus*)  
498 routinely trained under terrestrial conditions modify the pectoral fin skeleton through plasticity and  
499 develop morphological conditions observed in stem tetrapods (Standen et al., 2014). In another, *vav2*  
500 and *waslb* mutant zebrafish develop limb-like long bones connected by joints within the pectoral fins  
501 (Hawkins et al., 2018, preprint). West-Eberhard (2005b) reviewed a goat born with congenital paralysis  
502 of forelimbs, which performed bipedal locomotion. This behavioral accommodation led to highly  
503 modified musculoskeletal anatomy of the axial column, pelvis, and hindlimbs (Slijper, 1942a, 1942b).  
504 As shown in *nkx3.2*<sup>-/-</sup> zebrafish, these experimental manipulations and clinical reports illustrate that  
505 adaptive forms emerge from developmentally plastic responses to functional constraints — and  
506 therefore may converge onto phenotype independently exploited by a distant lineage — even after  
507 development has laid out lineage-specific patterns (such as homologies of individual bones).

508

### 509 ***nkx3.2* mutants as a unique model for skeletal development and disease**

510 Mechanisms of developmentally plastic remodeling, whether at the level of whole-animal behavior or  
511 gene transcription, remain an elusive component of skeletal development that is challenging to test  
512 experimentally. Therefore, *nkx3.2*<sup>-/-</sup> zebrafish provide a unique experimental system in which to test  
513 further the role of a joint in skeletal development. For example: a) What genetic mechanisms regulate  
514 the remodeling of intramembranous ossifications? b) What components of the remodeling process  
515 respond to jaw-joint dysfunction? and c) Does any feedback exist to coordinate remodeling between  
516 developmentally independent, but functionally connected units (e.g., premaxilla-maxilla complex and  
517 kinethmoid)? Such insights would begin to fill in knowledge gaps regarding skeletal and joint diseases  
518 including osteoarthritis and joint ankylosis.

519 The non-atavistic nature of the *nkx3.2*<sup>-/-</sup> phenotype is potentially useful to reevaluate  
520 evolutionarily inspired interpretations of phenocopies in general. There are no evolutionary  
521 relationships in the similarities between *nkx3.2*<sup>-/-</sup> zebrafish and anaspids or thelodonts. Anaspids are a  
522 stem cyclostome lineage (Miyashita et al., 2019) (Fig. 6G), and thus a poor surrogate for an ancestral  
523 state. The lineages between anaspids and thelodonts, or those between thelodonts and the gnathostome  
524 crown, do not share a similar combination of morphological traits, but instead are dorsoventrally  
525 depressed forms (Janvier, 1996; Miyashita, 2016; Miyashita et al., 2019) (Fig. 6G). Finally, head

526 similarities between the mutants and the stem taxa do not extend beyond overall configuration. No  
527 skull elements are lost or replaced in *nkx3.2<sup>-/-</sup>* zebrafish to achieve the anaspid/thelodont-like  
528 micromery (Blom et al., 2001; Janvier, 1996; Märss et al., 2007). Therefore, the adult *nkx3.2<sup>-/-</sup>*  
529 phenotype clearly does not represent a reversal to an ancestral state. Although experimental  
530 phenocopies are often interpreted as atavistic (ancestral reversal), alternative interpretations are seldom  
531 tested (Smith and Schneider, 1998). Here, our *nkx3.2<sup>-/-</sup>* zebrafish present developmental plasticity as a  
532 testable alternative to atavistic reversal to explain a phenocopy. By showing that a gnathostome can  
533 survive without a jaw, the anaspid/thelodont-like *nkx3.2<sup>-/-</sup>* zebrafish also offer a comparative model to  
534 make inferences about the functional morphology of these long-extinct agnathans.

535

### 536 **Acknowledgements**

537 We thank B.F. Eames (University of Saskatchewan) for facilitating our collaboration; M.E. Bronner  
538 (California Institute of Technology), S.J. Childs (University of Calgary), M.I. Coates, V.E. Prince, and  
539 M.W. Westneat (University of Chicago) for discussion; and members of the Allison and Prince labs for  
540 maintenance of *nkx3.2<sup>ua5011</sup>*.

541

### 542 **Competing interests**

543 The authors declare no competing or financial interests.

544

### 545 **Author contributions**

546 T.M. conceived project; T.M. and A.P.O. performed experiments resulting in *nkx3.2<sup>ua5011</sup>*; J.S. and  
547 N.N. performed experiments resulting in *nkx3.2<sup>el802</sup>*; P.B. and B.G. provided  $\mu$ CT scanning and  
548 histological sampling; T.M. and P.B. conducted morphometric analyses; T.M., P.B., A.R.P., J.G.C.,  
549 D.G., and W.T.A. analyzed data; T.M. wrote the paper with inputs from P.B., A.P.O., J.S., A.R.P.,  
550 J.G.C., D.G., and W.T.A.

551

552 **Funding.** This work was supported by Natural Science and Engineering Research Council grants  
553 RGPIN-2014-04863, RGPIN-2014-06311, and RGPIN-2015-06006 (to A.R.P., D.G., and W.T.A.,  
554 respectively) and National Institute of Health grants R35DE027550 and K99 DE027218 (to J.G.C. and  
555 J.S., respectively).

556

### 557 **Supplementary information**



558 Sequence information, measurements, and landmark coordinates are available as data supplements to  
559 this paper.

560

561 **Movie S1. Feeding behaviour and 3D  $\mu$ CT scans of jawless zebrafish.** Phenotypic comparison of  
562 *nkx3.2<sup>-/-</sup>* and wildtype zebrafish. Three-dimensional rendering of  $\mu$ CT scan of the age-matched *nkx3.2<sup>-/-</sup>*  
563 (ua5011) and wildtype (AB strain) zebrafish at 2 mpf, each followed by filming of feeding behavior on  
564 brine shrimp played at 1/10 original speed.

565

#### 566 **Data supplements**

567 **Data supplement 1.** Sequence information for the *nkx3.2* allele ua5011.

568 **Data supplement 2.** Gape angles and other linear measurements in zebrafish; gape angles and orbit  
569 diameter in anaspids.

570 **Data supplement 3.** Thin-plate-spline landmark data in zebrafish (wildtype and *nkx3.2<sup>-/-</sup>*) and anaspids  
571 used for Procrustes transformation, which were subjected to principal component analysis.

572

573

574 **REFERENCES**

- 575 Adekeye EO. 1983. Ankylosis of the mandible: Analysis of 76 cases. *J. Oral Maxillofac. Surg.* **41**:442–  
576 449. doi:10.1016/0278-2391(83)90129-5
- 577 Alexander RM. 1970. Mechanics of the feeding action of various teleost fishes. *J. Zool.* **162**:145–156.  
578 doi:10.1111/j.1469-7998.1970.tb01261.x
- 579 Alexander RMcN. 1969. Mechanics of the feeding action of a cyprinid fish. *J. Zool.* **159**:1–15.  
580 doi:10.1111/j.1469-7998.1969.tb03067.x
- 581 Appleton RD, Palmer AR. 1988. Water-borne stimuli released by predatory crabs and damaged prey  
582 induce more predator-resistant shells in a marine gastropod. *PNAS* **85**:4387–4391.  
583 doi:10.1073/pnas.85.12.4387
- 584 Askary A, Mork L, Paul S, He X, Izuhara AK, Gopalakrishnan S, Ichida JK, McMahon AP,  
585 Dabizljevic S, Dale R, Mariani FV, Crump JG. 2015. Iroquois proteins promote skeletal joint  
586 formation by maintaining chondrocytes in an immature state. *Dev. Cell* **35**:358–365.  
587 doi:10.1016/j.devcel.2015.10.004
- 588 Askary A, Xu P, Barske L, Bay M, Bump P, Balczerski B, Bonaguidi MA, Crump JG. 2017. Genome-  
589 wide analysis of facial skeletal regionalization in zebrafish. *Development* **144**:2994–3005.  
590 doi:10.1242/dev.151712
- 591 Barske L, Askary A, Zuniga E, Balczerski B, Bump P, Nichols JT, Crump JG. 2016. Competition  
592 between Jagged-Notch and Endothelin1 signaling selectively restricts cartilage formation in the  
593 zebrafish upper face. *PLoS Genet.* **12**:e1005967. doi:10.1371/journal.pgen.1005967
- 594 Bayram B, Uckan S, Cetinsahin A, Arman Ozcirpici A, Ozdemir H, Yazici C. 2010. Repositioning of  
595 the masseter muscle and its effect on skeletal growth. *Oral Surg. Med. Pathol. Radiol.*  
596 *Endodontol.* **109**:e1–e5. doi:10.1016/j.tripleo.2009.12.041
- 597 Bixler D, Ward R, Gale DD. 1985. Agnathia-holoprosencephaly: A developmental field complex  
598 involving face and brain. Report of 3 cases. *J. Craniofac. Genet. Dev. Biol. Suppl* **1**:241–249.
- 599 Blom H, Märss T. 2010. The interrelationships and evolutionary history of anaspid fishes In: Elliott  
600 DK, Maisey JG, Yu X, Miao D, editors. *Morphology, Phylogeny and Palaeogeography of*  
601 *Fossil Fishes – Honoring Meemann Chang*. Munich: Verlag Dr. Fredrich Pfeil.
- 602 Blom H, Märss T, Miller CG. 2001. Silurian and earliest Devonian birkeniid anaspids from the  
603 Northern Hemisphere. *Eart. Envir. Sci. Trans. R. Soc. Edinbur.* **92**:263–323.  
604 doi:10.1017/S0263593300000250
- 605 Brown DM, Marsh JL. 1990. Agnathia and associated malformations: A case report. *Clef. Palat. J.*  
606 **27**:415–418. doi:10.1597/1545-1569\_1990\_027\_0415\_aaamac\_2.3.co\_2

- 607 Cairns DM, Sato ME, Lee PG, Lassar AB, Zeng L. 2008. A gradient of Shh establishes mutually  
608 repressing somitic cell fates induced by Nkx3.2 and Pax3. *Dev. Biol.* **323**:152–165.  
609 doi:10.1016/j.ydbio.2008.08.024
- 610 Caron MMJ, Emans PJ, Surtel DAM, van der Kraan PM, van Rhijn LW, Welting TJM. 2015. BAPX-  
611 1/NKX-3.2 acts as a chondrocyte hypertrophy molecular switch in osteoarthritis. *Arthrit.*  
612 *Rheumatol.* **67**:2944–2956. doi:10.1002/art.39293
- 613 Cerny R, Cattell M, Sauka-Spengler T, Bronner-Fraser M, Yu F, Medeiros DM. 2010. Evidence for the  
614 prepattern/cooption model of vertebrate jaw evolution. *Proc. Nat. Acad. Sci.* **107**:17262–17267.  
615 doi:10.1073/pnas.1009304107
- 616 Chidzonga MM. 1999. Temporomandibular joint ankylosis: Review of thirty-two cases. *Brit. J. Oral*  
617 *Maxillofac. Surg.* **37**:123–126. doi:10.1054/bjom.1997.0089
- 618 Cubbage CC, Mabee PM. 1996. Development of the cranium and paired fins in the zebrafish *Danio*  
619 *rerio* (Ostariophysi, Cyprinidae). *J. Morphol.* **229**:121–160. doi:10.1002/(SICI)1097-  
620 4687(199608)229:2<121::AID-JMOR1>3.0.CO;2-4
- 621 Depew MJ, Compagnucci C. 2008. Tweaking the hinge and caps: Testing a model of the organization  
622 of jaws. *J. Exp. Zool.* **310B**:315–335. doi:10.1002/jez.b.21205
- 623 Depew MJ, Simpson CA. 2006. 21st Century neontology and the comparative development of the  
624 vertebrate skull. *Dev. Dyn.* **235**:1256–1291. doi:10.1002/dvdy.20796
- 625 Depew MJ, Simpson CA, Morasso M, Rubenstein JLR. 2005. Reassessing the Dlx code: The genetic  
626 regulation of branchial arch skeletal pattern and development. *J. Anat.* **207**:501–561.  
627 doi:10.1111/j.1469-7580.2005.00487.x
- 628 Donoghue PCJ, Forey PL, Aldridge RJ. 2000. Conodont affinity and chordate phylogeny. *Biol. Rev.*  
629 **75**:191–251.
- 630 Edgell TC, Neufeld CJ. 2008. Experimental evidence for latent developmental plasticity: Intertidal  
631 whelks respond to a native but not an introduced predator. *Biol. Lett.* **4**:385–387.  
632 doi:10.1098/rsbl.2008.0204
- 633 El-Sheikh MM, Medra AM, Warda MH. 1996. Bird face deformity secondary to bilateral  
634 temporomandibular joint ankylosis. *J. Cranio-Maxillofac. Surg.* **24**:96–103.  
635 doi:10.1016/S1010-5182(96)80020-5
- 636 Gagnon JA, Valen E, Thyme SB, Huang P, Ahkmetova L, Pauli A, Montague TG, Zimmerman S,  
637 Richter C, Schier AF. 2014. Efficient mutagenesis by Cas9 protein-mediated oligonucleotide  
638 insertion and large-scale assessment of single-guide RNAs. *PLoS One* **9**:e98186.  
639 doi:10.1371/journal.pone.0098186

- 640 Galis F. 1993. Interactions between the pharyngeal jaw apparatus, feeding behaviour, and ontogeny in  
641 the cichlid fish, *Haplochromis piceatus*: A study of morphological constraints in evolutionary  
642 ecology. *J. Exp. Zool.* **267**:137–154. doi:10.1002/jez.1402670207
- 643 Gekas J, Li B, Kamnasaran D. 2010. Current perspectives on the etiology of agnathia-otocephaly.  
644 *European J. Med. Genet.* **53**:358–366. doi:10.1016/j.ejmg.2010.09.002
- 645 Gillis JA, Modrell MS, Baker CVH. 2013. Developmental evidence for serial homology of the  
646 vertebrate jaw and gill arch skeleton. *Nat. Commun.* **4**:1436. doi:10.1038/ncomms2429
- 647 Gomes FEF, Moraes RB, Luz JG de C. 2012. Effects of temporal muscle detachment and  
648 coronoidotomy on facial growth in young rats. *Braz. Oral Res.* **26**:348–354.  
649 doi:10.1590/S1806-83242012000400011
- 650 Greenwood PH. 1965. Environmental effects on the pharyngeal mill of a cichlid fish, *Astatoreochromis*  
651 *alluaudi*, and their taxonomic implications. *Proc. Linn. Soc. Lond.* **176**:1–10.
- 652 Hall BK. 2015. *Bones and Cartilage: Developmental and Evolutionary Skeletal Biology*. 2nd edition.  
653 London: Academic Press.
- 654 Hawkins MB, Henke K, Harris MP. 2018. Latent developmental potential to form limb-like skeletal  
655 structures in zebrafish. *bioRxiv* 450619. doi:10.1101/450619
- 656 Hecksher-Sørensen J, Watson RP, Lettice LA, Serup P, Eley L, Angelis CD, Ahlgren U, Hill RE. 2004.  
657 The splanchnic mesodermal plate directs spleen and pancreatic laterality, and is regulated by  
658 *Bapx1/Nkx3.2*. *Development* **131**:4665–4675. doi:10.1242/dev.01364
- 659 Hellemans J, Simon M, Dheedene A, Alanay Y, Mihci E, Rifai L, Sefiani A, van Bever Y, Meradji M,  
660 Superti-Furga A, Mortier G. 2009. Homozygous inactivating mutations in the *NKX3-2* gene  
661 result in spondylo-megaepiphyseal-metaphyseal dysplasia. *Am. J. Hum. Genet.* **85**:916–922.  
662 doi:10.1016/j.ajhg.2009.11.005
- 663 Herbrand H, Pabst O, Hill R, Arnold H-H. 2002. Transcription factors *Nkx3.1* and *Nkx3.2* (*Bapx1*)  
664 play an overlapping role in sclerotomal development of the mouse. *Mec. Dev.* **117**:217–224.  
665 doi:10.1016/S0925-4773(02)00207-1
- 666 Hernandez LP. 2000. Intraspecific scaling of feeding mechanics in an ontogenetic series of zebrafish,  
667 *Danio rerio*. *J. Exp. Biol.* **203**:3033–3043.
- 668 Hernandez LP, Bird NC, Staab KL. 2007. Using zebrafish to investigate cypriniform evolutionary  
669 novelties: Functional development and evolutionary diversification of the kinethmoid. *J. Exp.*  
670 *Zool.* **308B**:625–641. doi:10.1002/jez.b.21166
- 671 Horowitz SL, Shapiro HH. 1955. Modification of skull and jaw architecture following removal of the  
672 masseter muscle in the rat. *Am. J. Phys. Anthropol.* **13**:301–308. doi:10.1002/ajpa.1330130208

- 673 Howland HC, Merola S, Basarab JR. 2004. The allometry and scaling of the size of vertebrate eyes.  
674 *Vis. Res.* **44**:2043–2065. doi:10.1016/j.visres.2004.03.023
- 675 Hu Y, Albertson RC. 2017. Baby fish working out: An epigenetic source of adaptive variation in the  
676 cichlid jaw. *Proc R Soc B* **284**:20171018. doi:10.1098/rspb.2017.1018
- 677 Janvier P. 2007. Homologies and evolutionary transitions in early vertebrate history In: Anderson JS,  
678 Sues H-D, editors. Major Transitions in Vertebrate Evolution. Bloomington: Indiana University  
679 Press. pp. 57–121.
- 680 Janvier P. 1996. Early Vertebrates, Oxford Monographs on Geology and Geophysics. Oxford:  
681 Clarendon Press.
- 682 Kaji T, Palmer AR. 2017. How reversible is development? Contrast between developmentally plastic  
683 gain and loss of segments in barnacle feeding legs. *Evolution* **71**:756–765.  
684 doi:10.1111/evo.13152
- 685 Kawato Y, Hirao M, Ebina K, Shi K, Hashimoto J, Honjo Y, Yoshikawa H, Myoui A. 2012. Nkx3.2  
686 promotes primary chondrogenic differentiation by upregulating Col2a1 transcription. *PLoS One*  
687 **7**:e34703. doi:10.1371/journal.pone.0034703
- 688 Keating JN, Donoghue PCJ. 2016. Histology and affinity of anaspids, and the early evolution of the  
689 vertebrate dermal skeleton. *Proc. R. Soc. B* **283**:20152917. doi:10.1098/rspb.2015.2917
- 690 Kiaer J. 1924. The Downtonian fauna of Norway. I. Anaspida with a geological introduction. *Skriifter*  
691 **6**:1–139.
- 692 Kimmel CB, Ballard WW, Kimmel SR, Ullmann B, Schilling TF. 1995. Stages of embryonic  
693 development of the zebrafish. *Dev. Dyn.* **203**:253–310. doi:10.1002/aja.1002030302
- 694 Klingenberg CP. 2011. MorphoJ: An integrated software package for geometric morphometrics. *Mol.*  
695 *Ecol. Res.* **11**:353–357. doi:10.1111/j.1755-0998.2010.02924.x
- 696 Kuratani S. 2012. Evolution of the vertebrate jaw from developmental perspectives. *Evol. Dev.* **14**:76–  
697 92. doi:10.1111/j.1525-142X.2011.00523.x
- 698 Labun K, Montague TG, Gagnon JA, Thyme SB, Valen E. 2016. CHOPCHOP v2: A web tool for the  
699 next generation of CRISPR genome engineering. *Nuc. Acids Res* **44**:W272–W276.  
700 doi:10.1093/nar/gkw398
- 701 Lauder GV. 1980. Evolution of the feeding mechanism in primitive actionopterygian fishes: A  
702 functional anatomical analysis of *Polypterus*, *Lepisosteus*, and *Amia*. *J. Morphol.* **163**:283–317.  
703 doi:10.1002/jmor.1051630305
- 704 Lauder GV. 1979. Feeding mechanics in primitive teleosts and in the halecomorph fish *Amia calva*. *J.*  
705 *Zool.* **187**:543–578. doi:10.1111/j.1469-7998.1979.tb03386.x

- 706 Lengner CJ, Hassan MQ, Serra RW, Lepper C, Wijnen AJ van, Stein JL, Lian JB, Stein GS. 2005.  
707 Nkx3.2-mediated repression of Runx2 promotes chondrogenic differentiation. *J. Biol. Chem.*  
708 **280**:15872–15879. doi:10.1074/jbc.M411144200
- 709 Lettice L, Hecksher-Sørensen J, Hill R. 2001. The role of Bapx1 (Nkx3.2) in the development and  
710 evolution of the axial skeleton. *J. Anat.* **199**:181–187. doi:10.1046/j.1469-  
711 7580.2001.19910181.x
- 712 Liem KF, Osse JWM. 1975. Biological versatility, evolution, and food resource exploitation in African  
713 cichlid fishes. *Integr. Comp. Biol.* **15**:427–454. doi:10.1093/icb/15.2.427
- 714 Lifshitz J. 1976. Comparative anatomic study of mandibular growth in rats after bilateral resections of  
715 superficial masseter, posterior temporal, and anterior digastric muscles. *J. Dent. Res.* **55**:854–  
716 858. doi:10.1177/00220345760550052301
- 717 Lukas P, Olsson L. 2018a. Bapx1 is required for jaw joint development in amphibians. *Evol. Dev.*  
718 **20**:192–206. doi:10.1111/ede.12267
- 719 Lukas P, Olsson L. 2018b. Bapx1 upregulation is associated with ectopic mandibular cartilage  
720 development in amphibians. *Zool. Lett.* **4**:16. doi:10.1186/s40851-018-0101-3
- 721 Manganello-Souza LC, Mariani PB. 2003. Temporomandibular joint ankylosis: Report of 14 cases.  
722 *International J. Oral Maxillofac. Surg.* **32**:24–29. doi:10.1054/ijom.2002.0308
- 723 Märss T, Turner S, Karatajūtė-Talimaa V. 2007. Handbook of Paleoichthyology / “Agnatha” II.  
724 Thelodonti. München: Verlag Dr. Friedrich Pfeil.
- 725 Medeiros DM, Crump JG. 2012. New perspectives on pharyngeal dorsoventral patterning in  
726 development and evolution of the vertebrate jaw. *Dev. Biol.* **371**:121–135.  
727 doi:10.1016/j.ydbio.2012.08.026
- 728 Meyer A. 1987. Phenotypic plasticity and heterochrony in *Cichlasoma managuense* (Pisces, Cichlidae)  
729 and their implications for speciation in cichlid fishes. *Evolution* **41**:1357–1369.  
730 doi:10.1111/j.1558-5646.1987.tb02473.x
- 731 Miller CT, Yelon D, Stainier DYR, Kimmel CB. 2003. Two endothelin 1 effectors, hand2 and bapx1,  
732 pattern ventral pharyngeal cartilage and the jaw joint. *Development* **130**:1353–1365.  
733 doi:10.1242/dev.00339
- 734 Miyashita T. 2016. Fishing for jaws in early vertebrate evolution: A novel hypothesis of mandibular  
735 confinement. *Biol. Rev.* **91**:611–657. doi:10.1111/brv.12187
- 736 Miyashita T. 2012. Comparative Analysis of the Anatomy of the Myxinoidea and the Ancestry of Early  
737 Vertebrate Lineages (Unpublished M.Sc. thesis). Edmonton: University of Alberta.



- 738 Miyashita T, Coates MI, Farrar R, Larson P, Manning PL, Wogelius RA, Edwards NP, Anné J,  
739 Bergmann U, Palmer AR, Currie PJ. 2019. Hagfish from the Cretaceous Tethys Sea and a  
740 reconciliation of the morphological–molecular conflict in early vertebrate phylogeny. *Proc.*  
741 *Nat. Acad. Sci.* **116**:2146–2151. doi:10.1073/pnas.1814794116
- 742 Miyazaki M, Yonemitsu I, Takei M, Kure-Hattori I, Ono T. 2016. The imbalance of masticatory  
743 muscle activity affects the asymmetric growth of condylar cartilage and subchondral bone in  
744 rats. *Arc. Oral Biol.* **63**:22–31. doi:10.1016/j.archoralbio.2015.11.020
- 745 Montague TG, Cruz JM, Gagnon JA, Church GM, Valen E. 2014. CHOPCHOP: A CRISPR/Cas9 and  
746 TALEN web tool for genome editing. *Nuc. Acids Res.* **42**:W401–W407.  
747 doi:10.1093/nar/gku410
- 748 Murtaugh LC, Zeng L, Chyung JH, Lassar AB. 2001. The chick transcriptional repressor Nkx3.2 acts  
749 downstream of Shh to promote BMP-dependent axial chondrogenesis. *Dev. Cell* **1**:411–422.  
750 doi:10.1016/S1534-5807(01)00039-9
- 751 Neufeld CJ, Palmer AR. 2008. Precisely proportioned: Intertidal barnacles alter penis form to suit  
752 coastal wave action. *Proc. R. Soc. B* **275**:1081–1087. doi:10.1098/rspb.2007.1760
- 753 Palmer AR. 2012. Developmental plasticity and the origin of novel forms: Unveiling cryptic genetic  
754 variation via “use and disuse.” *J. Exp. Zool. Part* **318B**:466–479. doi:10.1002/jez.b.21447
- 755 Provot S, Kempf H, Murtaugh LC, Chung U, Kim D-W, Chyung J, Kronenberg HM, Lassar AB. 2006.  
756 Nkx3.2/Bapx1 acts as a negative regulator of chondrocyte maturation. *Development* **133**:651–  
757 662. doi:10.1242/dev.02258
- 758 Rodrigues L, Traina AA, Nakamai LF, Luz JG de C. 2009. Effects of the unilateral removal and  
759 dissection of the masseter muscle on the facial growth of young rats. *Braz. Oral Res.* **23**:89–95.  
760 doi:10.1590/S1806-83242009000100015
- 761 Rohlf FJ. 2018. tpsDIG. New York.
- 762 Rohlf FJ. 1999. Shape statistics: Procrustes superimpositions and tangent spaces. *J. Classif.* **16**:197–  
763 223. doi:10.1007/s003579900054
- 764 Sansom RS, Freedman K, Gabbott SE, Aldridge RJ, Purnell MA. 2010. Taphonomy and affinity of an  
765 enigmatic Silurian vertebrate, *Jamoytius kerwoodi* White. *Palaeontology* **53**:1393–1409.  
766 doi:10.1111/j.1475-4983.2010.01019.x
- 767 Sarnat BG. 1970. The face and jaws after surgical experimentation with the septovomer region in  
768 growing and adult rabbits. *Acta Oto-Laryngol.* **69**:1–30. doi:10.3109/00016487009131762
- 769 Sarnat BG, Muchnic H. 1971. Facial skeletal changes after mandibular condylectomy in the adult  
770 monkey. *J. Anat.* **108**:323–338.



- 771 Schiffer C, Tariverdian G, Schiesser M, Thomas MC, Sergi C. 2002. Agnathia-otocephaly complex:  
772 Report of three cases with involvement of two different Carnegie stages. *Am. J. Med. Genet.*  
773 **112**:203–208. doi:10.1002/ajmg.10672
- 774 Schilling TF, Kimmel CB. 1997. Musculoskeletal patterning in the pharyngeal segments of the  
775 zebrafish embryo. *Development* **124**:2945–2960.
- 776 Schneider A, Mijalski T, Schlange T, Dai W, Overbeek P, Arnold H-H, Brand T. 1999. The homeobox  
777 gene *itNKX3.2* is a target of left–right signalling and is expressed on opposite sides in chick  
778 and mouse embryos. *Curr. Biol.* **9**:911–S1. doi:10.1016/S0960-9822(99)80397-2
- 779 Slijper EJ. 1942a. Biologic-anatomical investigations on the bipedal gait and upright posture in  
780 mammals, with special reference to a little goat, born without forelegs. I. *Proc. Konink. Ned.*  
781 *Akad. Wet.* **45**:288–295.
- 782 Slijper EJ. 1942b. Biologic-anatomical investigations on the bipedal gait and upright posture in  
783 mammals, with special reference to a little goat, born without forelegs. II. *Proc. Konink. Ned.*  
784 *Akad. Wet.* **45**:407–415.
- 785 Smeeton J, Askary A, Gage Crump J. 2016. Building and maintaining joints by exquisite local control  
786 of cell fate. *WIREs Dev. Biol.* **6**:e245. doi:10.1002/wdev.245
- 787 Smith KK, Schneider RA. 1998. Have gene knockouts caused evolutionary reversals in the mammalian  
788 first arch? *BioEssays* **20**:245–255. doi:10.1002/(SICI)1521-1878(199803)20:3<245::AID-  
789 BIES8>3.0.CO;2-Q
- 790 Smith LD, Palmer AR. 1994. Effects of manipulated diet on size and performance of brachyuran crab  
791 claws. *Science* **264**:710–712. doi:10.1126/science.264.5159.710
- 792 Standen EM, Du TY, Larsson HCE. 2014. Developmental plasticity and the origin of tetrapods. *Nature*  
793 **513**:54–58. doi:10.1038/nature13708
- 794 Stewart TA, Albertson RC. 2010. Evolution of a unique predatory feeding apparatus: Functional  
795 anatomy, development and a genetic locus for jaw laterality in Lake Tanganyika scale-eating  
796 cichlids. *BMC Biol.* **8**:8. doi:10.1186/1741-7007-8-8
- 797 Toledo LG, Cavalcanti SCXB, Corrêa L, Luz JGC. 2014. Effects of injury or removal of the articular  
798 disc on maxillomandibular growth in young rats. *J. Oral Maxillofac. Surg.* **72**:2140–2147.  
799 doi:10.1016/j.joms.2014.06.445
- 800 Tucker AS, Watson RP, Lettice LA, Yamada G, Hill RE. 2004. *Bapx1* regulates patterning in the  
801 middle ear: Altered regulatory role in the transition from the proximal jaw during vertebrate  
802 evolution. *Development* **131**:1235–1245. doi:10.1242/dev.01017

- 803 West-Eberhard MJ. 2005a. Developmental plasticity and the origin of species differences. *Proc. Nat.*  
804 *Acad. Sci.* **102**:6543–6549. doi:10.1073/pnas.0501844102
- 805 West-Eberhard MJ. 2005b. Phenotypic accommodation: Adaptive innovation due to developmental  
806 plasticity. *J. Exp. Zool.* **304B**:610–618. doi:10.1002/jez.b.21071
- 807 West-Eberhard MJ. 2003. *Developmental Plasticity and Evolution*, 1 edition. ed. Oxford ; New York:  
808 Oxford University Press.
- 809 Westneat MW. 2004. Evolution of levers and linkages in the feeding mechanisms of fishes. *Integr*  
810 *Comp Biol* **44**:378–389. doi:10.1093/icb/44.5.378
- 811 Westneat MW. 2005. Skull biomechanics and suction feeding in fishes. *Fish Physiology, Fish*  
812 *Biomechanics*. Academic Press. pp. 29–75. doi:10.1016/S1546-5098(05)23002-9
- 813 Wilson J, Tucker AS. 2004. Fgf and Bmp signals repress the expression of Bapx1 in the mandibular  
814 mesenchyme and control the position of the developing jaw joint. *Dev. Biol.* **266**:138–150.  
815 doi:10.1016/j.ydbio.2003.10.012
- 816 Wilson MVH, Caldwell MW. 1998. The Furcacaudiformes: A new order of jawless vertebrates with  
817 thelodont scales, based on articulated Silurian and Devonian fossils from northern Canada. *J.*  
818 *Vert. Paleontol.* **18**:10–29. doi:10.1080/02724634.1998.10011031
- 819 Wilson MVH, Caldwell MW. 1993. New Silurian and Devonian fork-tailed “thelodonts” are jawless  
820 vertebrates with stomachs and deep bodies. *Nature* **361**:442–444. doi:10.1038/361442a0
- 821 Wimberger PH. 1992. Plasticity of fish body shape. The effects of diet, development, family and age in  
822 two species of *Geophagus* (Pisces: Cichlidae). *Biol. J. Linn. Soc.* **45**:197–218.  
823 doi:10.1111/j.1095-8312.1992.tb00640.x
- 824 Wimberger PH. 1991. Plasticity of jaw and skull morphology in the Neotropical cichlids *Geophagus*  
825 *Brasiliensis* and *G. Steindachneri*. *Evolution* **45**:1545–1563. doi:10.1111/j.1558-  
826 5646.1991.tb02662.x
- 827 Yamashita S, Andoh M, Ueno-Kudoh H, Sato T, Miyaki S, Asahara H. 2009. Sox9 directly promotes  
828 Bapx1 gene expression to repress Runx2 in chondrocytes. *Exp. Cell Res.* **315**:2231–2240.  
829 doi:10.1016/j.yexcr.2009.03.008
- 830 Zeng L, Kempf H, Murtaugh LC, Sato ME, Lassar AB. 2002. Shh establishes an Nkx3.2/Sox9  
831 autoregulatory loop that is maintained by BMP signals to induce somitic chondrogenesis. *Genes*  
832 *Dev.* **16**:1990–2005. doi:10.1101/gad.1008002
- 833
- 834

835 **FIGURES**

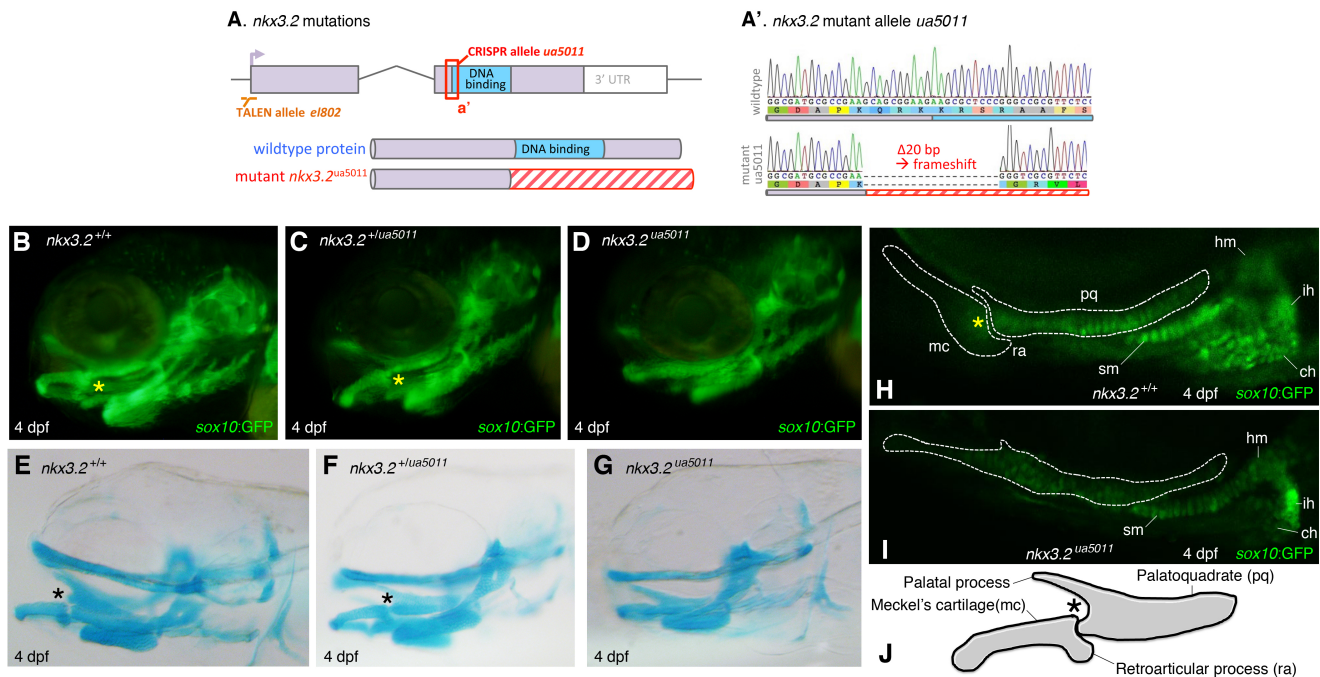

836  
837 **Fig. 1. Null alleles of *nkx3.2* in zebrafish result in the jaw joint ankylosis.**

838 (A) Mutations engineered with CRISPR/Cas9 or TALEN in the zebrafish gene *nkx3.2* that  
839 encodes the homeobox transcription factor protein Nkx3.2 (a.k.a. Bapx1). Top: The gene *nkx3.2*  
840 contains two exons (purple), the second of which encodes the homeobox domain (DNA binding  
841 domain, blue). The diagram is approximately to scale (exon 1 = 310 bp), except the 3' untranslated  
842 region (3'UTR). Allele *nkx3.2<sup>el802</sup>* was generated with TALEN technology that deleted 20 bp from the  
843 start of the gene (orange dashed line), eliminating the start codon. Allele *nkx3.2<sup>ua5011</sup>* was engineered  
844 with CRISPR/Cas9 to generate a 20 bp deletion (red box) and frameshift that is predicted to eliminate  
845 the homeodomain. Bottom: Schematic of predicted protein following CRISPR mutagenesis. In the  
846 allele *nkx3.2<sup>ua5011</sup>*, the frameshift (20 bp deletion) is predicted to disrupt the translation and abrogate  
847 production of the critical homeobox domain. This is predicted to produce random amino acids (red  
848 hatching). (A') Sequencing results from allele *nkx3.2<sup>ua5011</sup>* (lower) compared to a wildtype zebrafish  
849 (upper).

850 At 4 dpf, the chondrocrania are compared by *sox10*:eGFP expression in chondrocytes (B–D, H,  
851 I) or by alcian blue staining of cartilages (E–G) between age-matched specimens. (B, E) The  
852 chondrocranial morphology of wildtypes (AB background; *sox10*:eGFP) at 4 dpf in left lateral view, in  
853 *sox10*:eGFP expression within chondrocytes (B) and alcian blue staining of cartilages (E). (C, F) The  
854 chondrocranial morphology of *nkx3.2* heterozygous mutants (*nkx3.2<sup>+/ua5011</sup>*; *sox10*:eGFP) at 4 dpf in  
855 left lateral view, in *sox10*:eGFP expression within chondrocytes (C) and alcian blue staining of

856 cartilages (F). **(D, G)** The chondrocranial morphology of *nkx3.2* homozygous mutants (*nkx3.2<sup>ua5011</sup>*;  
857 *sox10:eGFP*) at 4 dpf in left lateral view, in *sox10:eGFP* expression within chondrocytes (D) and alcian  
858 blue staining of cartilages (G). **(H, I)** Comparison of jaw morphology between age-matched wildtype  
859 (AB background; *sox10:eGFP*) (H) and *nkx3.2* homozygous mutants (*nkx3.2<sup>ua5011</sup>*; *sox10:eGFP*) (I) at 4  
860 dpf in left lateral view, using *sox10:eGFP* expression within chondrocytes. White broken lines  
861 delineate the mandibular cartilages. **(J)** Schematic drawing of the mandibular cartilages in zebrafish at  
862 4 dpf in left lateral view, showing wildtype morphology (see panel E).

863 **Abbreviations:** asterisk (\*), jaw joint; **aa**, anguloarticular; **ar**, articular; **bh**, basihyal; **ch**,  
864 ceratohyal; **d**, dentary; **dpf**, days post fertilization; **hm**, hyomandibula; **ih**, interhyal; **j**, jugal; **ke**,  
865 kinethmoid; **lp**, lower lip; **mc**, Meckel's cartilage; **m**, maxilla; **n**, nostril or aperture of nasohypophyseal  
866 system; **o**, operculum; **pm**, premaxilla; **po**, preopercular; **pq**, palatoquadrate; **q**, quadrate; **ra**,  
867 retroarticular process; **sm**, symplectic; **up**, upper lip.

868



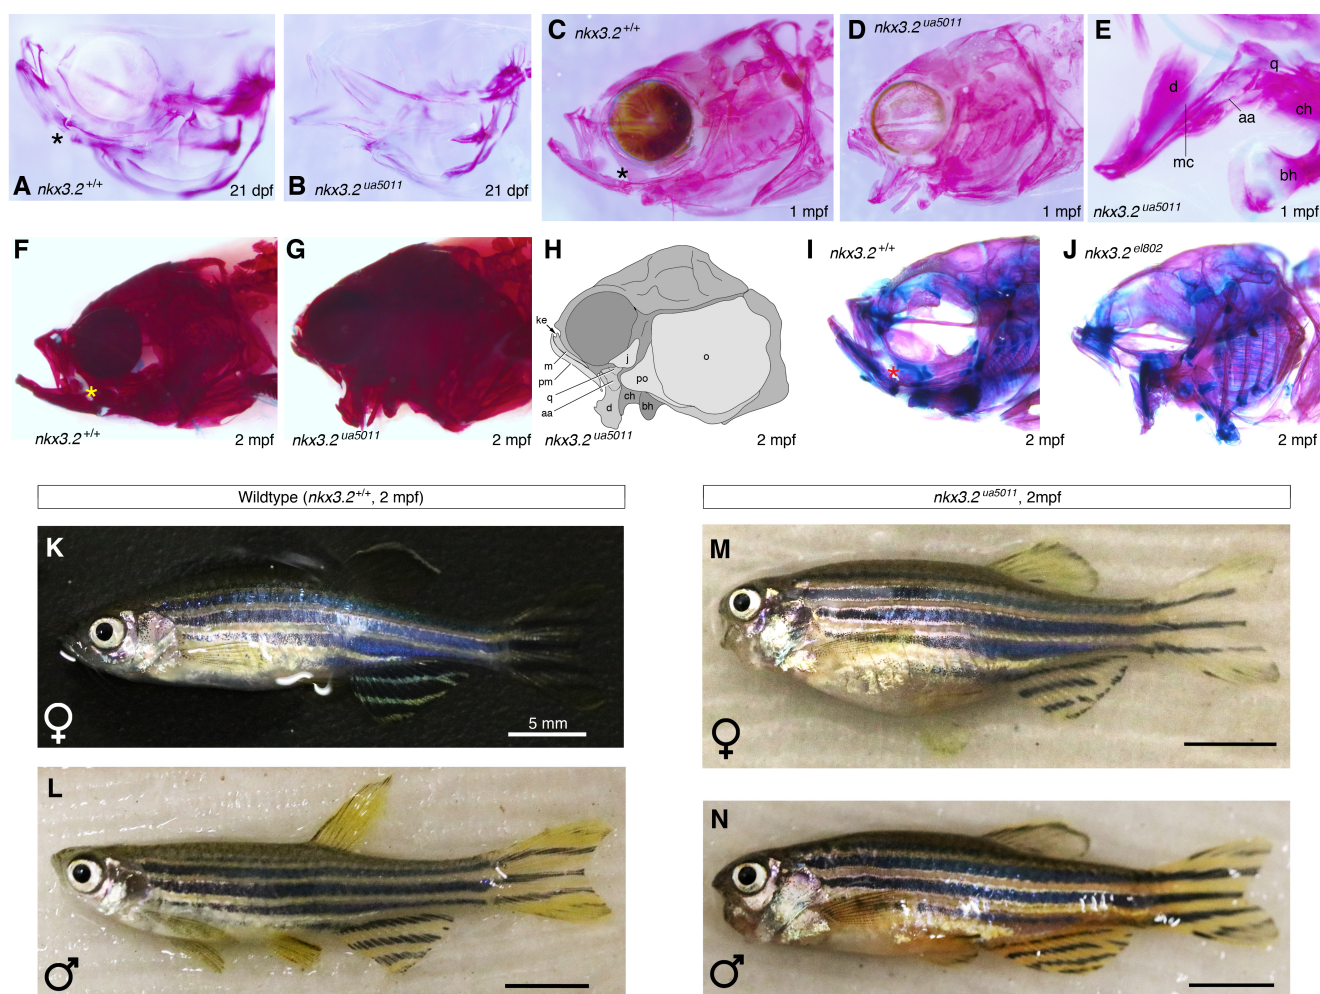

869

870 **Fig. 2. Ontogeny of *nkx3.2*<sup>-/-</sup> zebrafish documents drastic remodeling of the skull.**

871 (A, B) Comparison of the skull morphology between age-matched wildtype (AB strain) (A) and  
872 *nkx3.2* homozygous mutant (*nkx3.2<sup>ua5011</sup>*) (B) at 21 dpf in right lateral view (inverted for consistency  
873 with other panels), using alcian blue and alizarin red staining. (C, D) Comparison of skull morphology  
874 between age-matched wildtype (AB) (C) and *nkx3.2* homozygous mutant (*nkx3.2<sup>ua5011</sup>*) (D) at 1 mpf in  
875 left lateral view, using alcian blue and alizarin red staining. (E) Detailed morphology of jaw skeleton in  
876 *nkx3.2* homozygous mutant (*nkx3.2<sup>ua5011</sup>*) at 1 mpf in right lateral view (inverted for consistency with  
877 other panels), using alcian blue and alizarin red staining.

878 (F, G) Comparison of skull morphology between age-matched wildtype (AB) (F) and *nkx3.2*  
879 homozygous mutant (*nkx3.2<sup>ua5011</sup>*) (G) at 2 mpf in left lateral view, using alcian blue and alizarin red  
880 staining. (H) Interpretive drawing of the specimen in panel g.

881 (I, J) Comparison of skull morphology between age-matched wildtype (AB) (I) and *nkx3.2*  
882 homozygous mutant (*nkx3.2<sup>el802</sup>*) (J) at 2 mpf in left lateral view, using alcian blue and alizarin red  
883 staining. This second independent null allele of *nkx3.2* confirms the phenotypes reported herein.

884 (K–N) Comparison of overall morphology at 2 mpf among age-matched wildtype (AB)  
885 female (K) and male (L) and *nkx3.2*<sup>el802</sup> homozygous mutant (*nkx3.2*<sup>el802</sup>) female (M) and male (N) in left  
886 lateral view. Scale bars = 5 mm. Abbreviations follow Fig. 1.  
887  
888

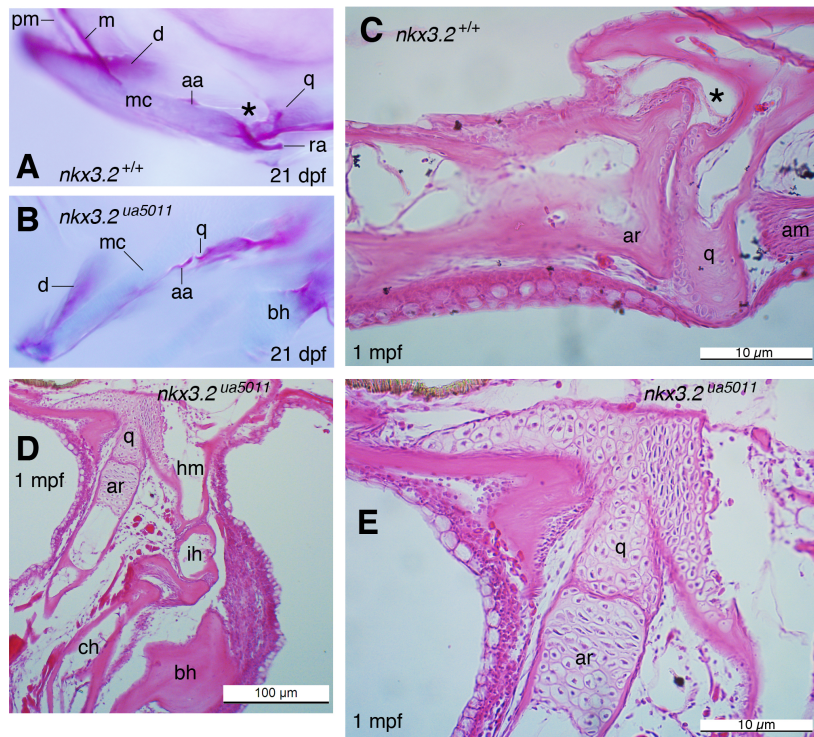

889

890 **Fig. 3. Detailed morphology of jaw joint in wildtype, or the joint-less interface between the upper**  
891 **and lower jaws in *nkx3.2*<sup>-/-</sup> mutants.**

892 (A, B) Detailed morphology of junction between upper and lower jaws in age-matched wildtype  
893 (A) and *nkx3.2* homozygous mutant (*nkx3.2*<sup>ua5011</sup>) (B) at 21 dpf in left lateral view, using alcian blue  
894 and alizarin red staining. (C, D) Sagittal section of junction between upper and lower jaws in age-  
895 matched wildtype (AB) (C) and *nkx3.2* homozygous mutant (*nkx3.2*<sup>ua5011</sup>) (D) at 1 mpf, stained with  
896 eosin and hematoxylin. (E) Detailed view of section in panel D.

897

898



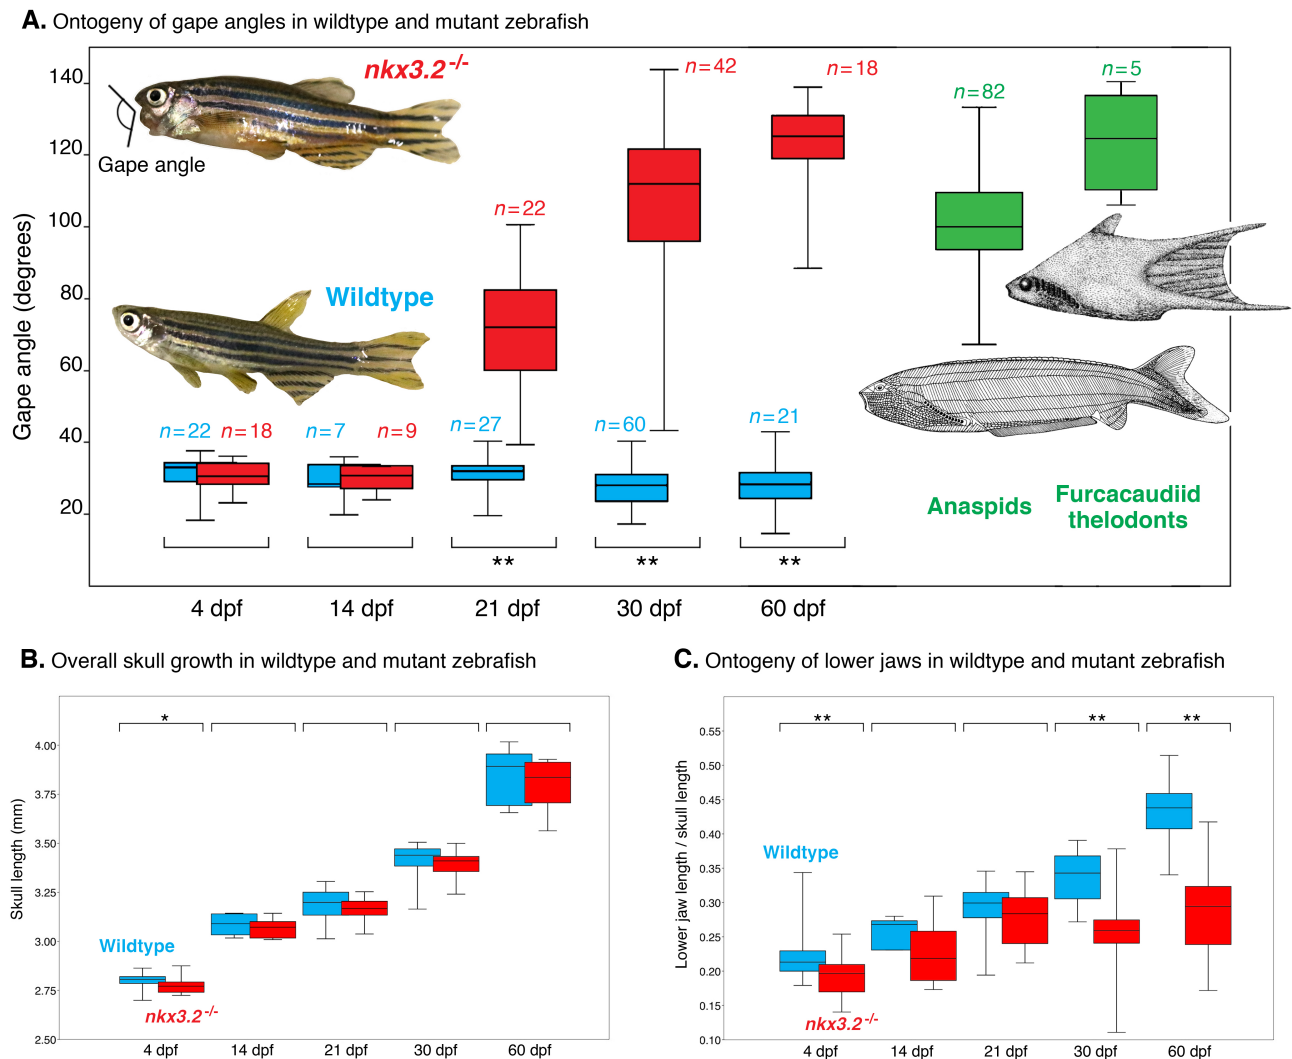

899  
900 **Fig. 4. Growth of *nkx3.2*<sup>-/-</sup> mutants in linear and proportional traits.**

901 (A) A marked departure from normal morphology (wildtype = blue) occurs in lower jaw  
902 orientations of *nkx3.2*<sup>-/-</sup> zebrafish (= red) past 14 dpf, coinciding in timing with metamorphosis (onset  
903 of intramembranous ossification in the skulls and active feeding). Fixed open gapes in the mutants at 1  
904 to 2 mpf are comparable to those of Paleozoic agnathan lineages, birkeniiform anaspids and  
905 furcaciid thelodonts (green). The orientations were measured here as gape, an angle between upper  
906 and lower lips at natural, resting position.

907 (B) Wildtype and *nkx3.2*<sup>-/-</sup> zebrafish do not differ significantly from each other in absolute  
908 sizes, except at 4 dpf. Here, skull length is selected to illustrate this general observation. (C)  
909 Proportional changes appear to follow shape changes in skeletal remodeling. The box plot shows  
910 phenotypic separation in relative lower jaw length between wildtype and *nkx3.2*<sup>-/-</sup> zebrafish at 1 and 2  
911 mpf, even though a significant difference developed in lower jaw orientation by 21 dpf.

912 Values are plotted as boxes of first and third quartile, with middle line displaying mean, and  
913 whiskers communicating maximum and minimum values ( $n$  = sample size, same across A–C). Asterisk  
914 indicates level of statistically significant difference in means ( $t$ -test): \*,  $P < 0.05$ ; \*\*,  $P < 0.01$ .  
915 Photographs of zebrafish are male representative specimens at 60 dpf (Fig. 2L, N). Drawings are:  
916 *Pharyngolepis oblonga* as a general representative of anaspids (after Blom et al., 2001; Kiaer, 1924);  
917 and *Furcacauda fredholmae* as a general representative of furcacaudiid thelodonts (after Wilson and  
918 Caldwell, 1993). See Data Supplement 2 for all original measurements.  
919  
920

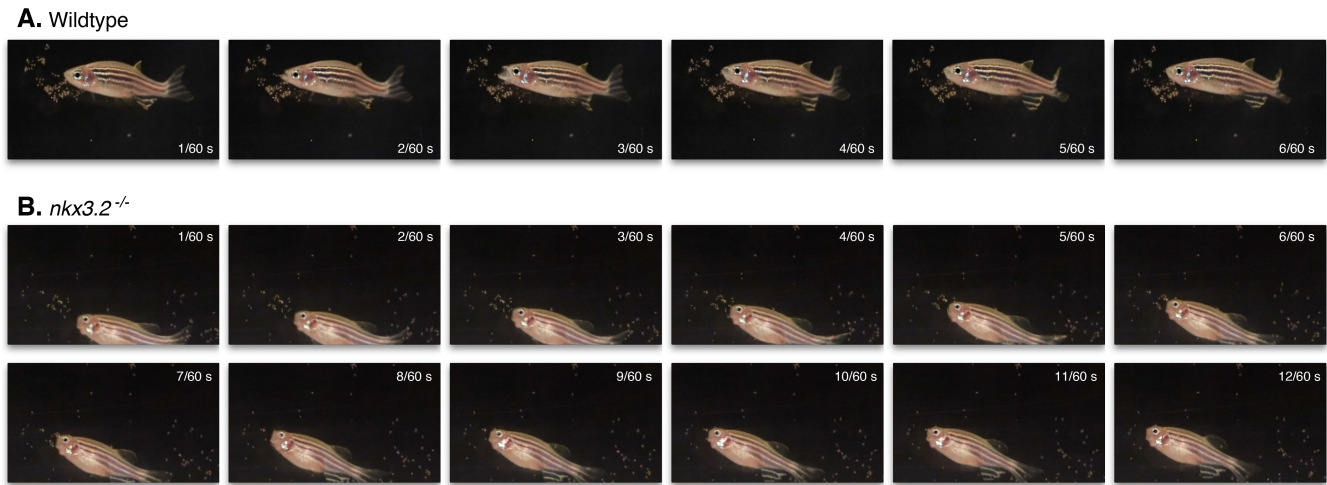

921

922 **Fig. 5. Functionally jawless *nkx3.2*<sup>-/-</sup> mutants perform ram feeding.**

923 (A) Wildtype zebrafish (6 mpf) use suction feeding, following the general principles of suction  
924 feeding mechanics of actinopterygians: lower jaw depression, forward swing of premaxilla and maxilla,  
925 expansion of parabranial cavity, and recoiling motions in that order. An entire cycle takes  
926 approximately 0.1 s. (B) No suction feeding was observed in *nkx3.2*<sup>-/-</sup> zebrafish (6 mpf); instead, they  
927 perform ram feeding (swim through food) with the fixed open gape. In this particular feeding episode,  
928 the mutant initiated a cycle with detection of food (change in swimming orientation) and turned  
929 laterally to exit that swimming trajectory in approximately 0.2 s. Frame by frame still images from a  
930 film captured at 60 frames per second. The movie is available as Supplementary Information (Movie  
931 S1).

932

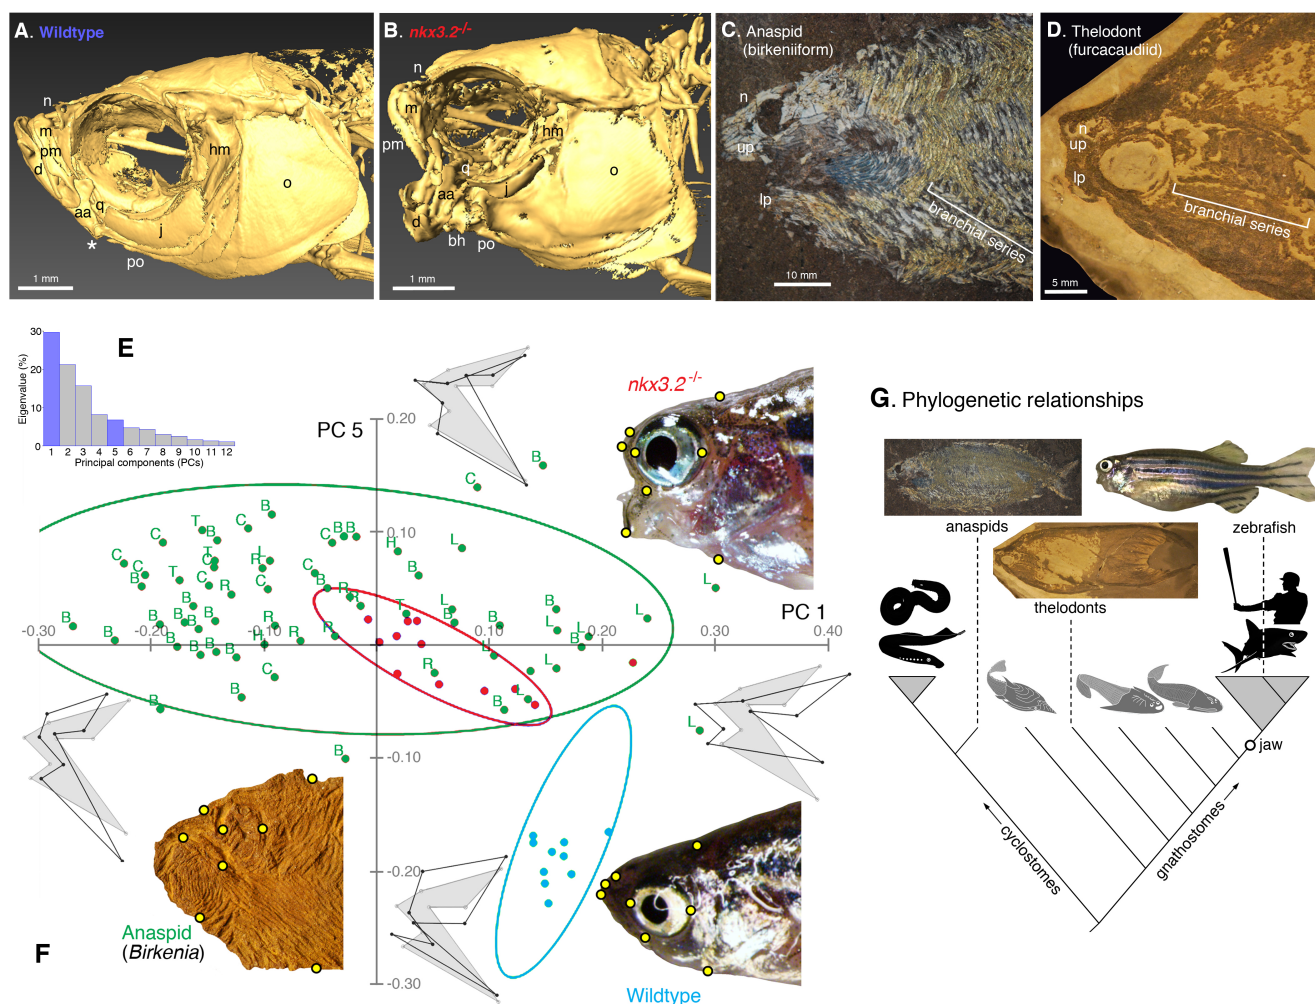

933

934 **Fig. 6. Adult *nkx3.2*<sup>-/-</sup> zebrafish converge onto overall head shapes of anaspids and thelodonts.**

935 (A, B) Skulls of adult zebrafish in left lateral view via micro-computed tomography ( $\mu$ CT)  
 936 showing wildtype and *nkx3.2*<sup>-/-</sup> null mutant zebrafish (allele *ua5011*; 20 bp deletion in homeodomain).  
 937 The jaw joint is indicated by an asterisk (\*) in wildtype (A) and absent in mutant (B). Adult mutants  
 938 display dramatic phenotypes in the jaw, snout, lips, and orobranchial regions. See also 3D rendering in  
 939 multiple angles (Movie S1). (C, D) Skulls of extinct jawless vertebrates, showing general resemblance  
 940 to the skull shape of *nkx3.2*<sup>-/-</sup> zebrafish. Morphometric analysis corroborates this similarity. (C) Skull of  
 941 an anaspid (birkeniid birkeniiform) from the Upper Silurian Cape Philips Formation of Cornwallis  
 942 Island, Canada (Geological Survey of Canada C-26661-005) in left lateral view. (D) Skull of  
 943 *Sphenonectris turnerae*, a thelodont (furcacaudiid furcacaudiiform) from the Lower Devonian Road  
 944 River Formation of Northwest Territories, Canada (University of Alberta Laboratory for Vertebrate  
 945 Palaeontology, specimen number 42212).

946 (E, F) Landmark-based geometric morphometric comparison of *nkx3.2* phenotype using the  
 947 thin-plate-spline Procrustes superimposition and principal component (PC) analysis. (E) Histogram

948 showing loading on each principal component in eigenvalue (%). PCs 1 and 5 are highlighted in blue.  
949 These two PCs were chosen for comparison between groups, as these are the two largest components  
950 that set apart *nkx3.2* homozygous mutants and wildtype zebrafish from each other at adult stage. PCs 2-  
951 4, though accounting for greater variation than PC5, primarily distinguish among anaspids, or within  
952 wildtype and mutant zebrafish groups. The original dataset is available (Data Supplement 3). (F) A  
953 Cartesian plot of PCs 1 and 5, comparing morphospace occupation between wildtypes (2 mpf) (blue),  
954 *nkx3.2* homozygous mutants (2 mpf) (red), and anaspids (green), each with 90% ellipse. End of each  
955 axis is labeled with a thin-plate-spline shape at that position (dark outline) against mean shape (grey  
956 silhouette). A representative specimen is shown with landmarks labeled (yellow circles) for each group  
957 in left lateral view. Each data point is a unique biological replicate (a specimen). The anaspid example  
958 is *Birkenia elegans* (National Museum of Scotland specimen number 1929.5.6 from a Silurian locality  
959 of Scotland). For anaspids, each data point is labeled with taxonomic identifications: B, *Birkenia*  
960 *elegans*; C, Birkeniidae indet. from the Cornwallis Island; H, *Pharyngolepis oblongus*; L, *Lasanius*  
961 *problematicus*; R, *Ryncholepis parvulus*; T, *Pterygolepis nitidus*.

962 (G) Simplified phylogenetic tree of vertebrates to illustrate distant relationships among the taxa  
963 compared in this paper. A 60 dpf gravid female specimen is shown for *nkx3.2*<sup>-/-</sup> zebrafish (Fig. 3M).  
964 Photographs of an anaspid and a thelodont are the same individuals in the respective panels showing  
965 cranial morphology (D, E). Grey triangle indicates a crown group (not to scale). Dark silhouettes and  
966 long branches indicate crown groups, whereas grey silhouettes and short branches represent extinct  
967 lineages.
